# 1 **Conserved Methyltransferase Spb1 Targets**

## 2 **mRNAs for Regulated Modification**

### 3 **with 2'-O-Methyl Ribose**

4

5 Kristen M. Bartoli<sup>1,5</sup>, Cassandra Schaening<sup>1,2,5</sup>, Thomas M. Carlile<sup>1,3</sup>, and Wendy V.

6 Gilbert<sup>1,4,6\*</sup>

7 1. MIT Department of Biology, Cambridge, MA 02139, USA

8 2. Graduate Program in Computational and Systems Biology, MIT, Cambridge, MA

9 02139, USA

10 3. Current address: Biogen, Cambridge, MA 02142, USA

11 4. Yale University, Department of Molecular Biophysics and Biochemistry, New

12 Haven, CT 06520, USA

13 5. These authors contributed equally.

14 6. Lead contact

15

16 \*Correspondence: [wendy.gilbert@yale.edu](mailto:wendy.gilbert@yale.edu)

17

18

## 19 **SUMMARY**

20

21 Non-coding RNAs contain dozens of chemically distinct modifications, of which only a

22 few have been identified in mRNAs. The recent discovery that certain tRNA modifying

23 enzymes also target mRNAs suggests the potential for many additional mRNA

24 modifications. Here, we show that conserved tRNA 2'-O-methyltransferases Trm3, 7,13

25 and 44, and rRNA 2'-O-methyltransferase Spb1, interact with specific mRNA sites in

26 yeast by crosslinking immunoprecipitation and sequencing (CLIP-seq). We developed  
27 sequencing of methylation at two prime hydroxyls (MeTH-seq) for transcriptome-wide  
28 mapping of 2'-O-methyl ribose (Nm) with single-nucleotide resolution, and discover  
29 thousands of potential Nm sites in mRNAs. Genetic analysis identified hundreds of  
30 mRNA targets for the Spb1 methyltransferase, which can target both mRNA and non-  
31 coding RNA for environmentally regulated modification. Our work identifies Nm as a  
32 prevalent mRNA modification that is likely to be conserved and provides methods to  
33 investigate its distribution and regulation.

34

35

## 36 **KEYWORDS**

37 2'-O-methyltransferase, 2'-O-methylribose, CLIP-seq, MeTH-seq, mRNA modifications

38

## 39 **HIGHLIGHTS**

- 40 • MeTH-seq identifies 2'-O-methylribose genome-wide at single-nucleotide  
41 resolution
- 42 • Five conserved methyltransferases interact with yeast mRNA
- 43 • Spb1 is a major mRNA 2'-O-methyltransferase, and targets most ribosomal  
44 protein mRNAs
- 45 • *SPB1* expression is required to maintain normal levels of Spb1 target mRNAs

46

## 47 **INTRODUCTION**

48

49 Non-coding RNAs, in particular transfer RNAs (tRNA), are heavily modified with more  
50 than 100 distinct post-transcriptional modifications that affect RNA structure, stability,

51 and function (Machnicka et al., 2013). The recent development of protocols for  
52 transcriptome-wide mapping of certain RNA modifications has revealed a complex and  
53 dynamic mRNA 'epitranscriptome' that includes N6-methyladenosine (m<sup>6</sup>A), 5-  
54 methylcytidine (m<sup>5</sup>C), inosine (I), pseudouridine (Ψ), 5-hydroxymethylcytidine (hm<sup>5</sup>C),  
55 and N1-methyladenosine (m<sup>1</sup>A) in eukaryotic cells (Gilbert et al., 2016; Li et al., 2016;  
56 Schaefer et al., 2017). Emerging evidence links regulated mRNA modifications, in  
57 particular m<sup>6</sup>A, to post-transcriptional gene regulation in diverse biological systems  
58 (Roignant and Soller, 2017; Yue et al., 2015). However, the full extent and diversity of  
59 mRNA modifications is unknown.

60

61 The discovery that some tRNA modifying enzymes, specifically pseudouridine synthases  
62 (Pus), also target mRNAs (Carlile et al., 2014; Lovejoy et al., 2014; Schwartz et al.,  
63 2014), suggests mRNAs might contain many more modifications than are currently  
64 known. Notably, the conserved tRNA 2'-O-methyltransferase, Trm44, was identified by  
65 proteomic analysis of highly purified UV cross-linked poly(A)<sup>+</sup> RNPs in yeast (Beckmann  
66 et al., 2015), together with Pus1 and Pus7, which modify dozens of mRNA targets  
67 (Carlile et al., 2014; Schwartz et al., 2014). Although no specific mRNA binding sites  
68 were identified for Trm44, its association with polyadenylated RNA in vivo suggests it  
69 may also target mRNAs in addition to tRNAs.

70

71 2'-O-methyl ribose can occur on any base (Nm) and is an abundant and highly  
72 conserved modification found at multiple locations in tRNA (Figure S1A), ribosomal RNA  
73 (rRNA), and small nuclear RNA (snRNA). Yeast tRNAs are 2'-O-methylated by four  
74 conserved Trm proteins. Trm3, orthologous to human TARBP1, modifies G18 or G19 in  
75 the D-loop of 12 different tRNAs (Cavaillé et al., 1999). Trm7 (FTSJ1) modifies two  
76 positions in the anticodon loops of tRNA<sup>Phe</sup>, tRNA<sup>Trp</sup>, and tRNA<sup>Leu</sup> (Pintard et al., 2002a).

77 Trm13 (CCDC76) modifies tRNA<sup>Gly</sup>, tRNA<sup>His</sup>, and tRNA<sup>Pro</sup> in the acceptor stem at  
78 position 4 or 5 (Wilkinson et al., 2007), and Trm44 (METTL19) modifies tRNA<sup>Ser</sup> at  
79 position 44 or 45 in the variable loop (Kotelawala et al., 2008). Four additional conserved  
80 2'-O-methyltransferases target cytosolic and mitochondrial ribosomes. Three of these are  
81 protein-only enzymes: Spb1 (FTSJ3), which modifies Gm2922 of the 25S rRNA  
82 (Lapeyre and Purushothaman, 2004), and Mrm1 (MRM1) and Mrm2 (MRM2), which  
83 modify Gm2270 and Um2791, respectively, of the 21S rRNA (Pintard et al., 2002b;  
84 Sirum-Connolly and Mason, 1993). The fourth, Nop1 (FBL), forms RNP complexes  
85 containing additional proteins and C/D-box small nucleolar RNAs (snoRNA) that direct  
86 methylation of dozens of sites on the 18S and 25S rRNAs by base pairing with the guide  
87 RNA (Kiss-László et al., 1996; Kiss, 2002). Unlike the snoRNA-guided enzymes, the  
88 basis for substrate specificity is incompletely understood for the protein-only 2'-O-  
89 methyltransferases. Thus, it is not possible to predict their RNA targets by bioinformatic  
90 analysis.

91

92 2'-O-methylation – and regulation of this modification – has the potential to broadly affect  
93 mRNA metabolism through effects on RNA structure, stability, RNA-protein interactions,  
94 and translation. 2'-O-methyl ribose increases the thermodynamic stability of RNA:RNA  
95 base pairs and stabilizes the C3' endo conformation of ribose found in A-form RNA  
96 duplexes (Inoue et al., 1987; Kawai et al., 1992; Majlessi et al., 1998; Tsourkas et al.,  
97 2002). In addition, many RNA tertiary structures involve the 2' hydroxyl groups of ribose  
98 (Butcher and Pyle, 2011), which can be disrupted by 2'-O-methylation (Lebars et al.,  
99 2008). Methylation of 2' hydroxyls can also inhibit RNA-protein interactions through steric  
100 effects (Hou et al., 2001; Lacoux et al., 2012) or by impacting hydrogen bonding, which  
101 frequently involves the 2' hydroxyl group (Jones et al., 2001; Treger and Westhof, 2001).  
102 2'-O-methylated nucleotides are also resistant to a variety of nucleases (Sproat et al.,

103 1989). Finally, 2'-O-methylation of synthetic mRNAs interferes with translation and  
104 induces site-specific ribosome stalling in vitro (Dunlap et al., 1971; Hoernes et al., 2015).  
105 Thus, it is of particular interest to know which natural mRNAs contain Nm and what  
106 enzymes install this modification in messenger RNAs.

107

108 Recent evidence suggests 2'-O-methyl ribose could be abundant in human mRNA, but  
109 the methyltransferases were not identified (Dai et al., 2017). Here we determine mRNA  
110 interaction sites genome-wide for five conserved RNA 2'-O-methyltransferases in yeast  
111 by UV crosslinking and immunoprecipitation (CLIP-seq). We then develop MeTH-seq, a  
112 genome-wide, single-nucleotide-resolution method to determine the locations of 2'-O-  
113 methyl ribose (Nm). We validate MeTH-seq by detecting known sites in non-coding  
114 RNAs and conservatively identify 690 novel methyltransferase-dependent Nm sites in  
115 yeast mRNAs by comprehensive profiling following deletion or depletion of conserved  
116 methyltransferases Trm3, 7, 13, and 44, which canonically target tRNA, and Spb1, which  
117 targets rRNA. We identify novel targets for each methyltransferase and find that Spb1 is  
118 the predominant mRNA methyltransferase in yeast. We further show that *SPB1* is  
119 required to maintain normal expression levels of a coherent regulon encoding proteins  
120 necessary for ribosome assembly. Finally, we show that mRNA Nm sites are regulated  
121 in response to environmental signals. Our results identify Spb1 as the primary  
122 methyltransferase installing Nm as a widespread, regulated mRNA modification that is  
123 likely to be conserved from yeast to man.

124

## 125 **RESULTS**

126

### 127 **Trm44 tRNA Methyltransferase Interacts with Specific mRNAs In Vivo**

128 The yeast genome encodes more than 60 proteins characterized as tRNA modifying  
129 enzymes (Phizicky and Hopper, 2010), of which several have recently been shown to  
130 target mRNAs (Carlile et al., 2014; Lovejoy et al., 2014; Schwartz et al., 2014). We  
131 hypothesized that mRNAs may be recognized and modified by additional enzymes  
132 among this cohort. As a first step towards identifying likely mRNA modifying factors, we  
133 examined published mRNA interactome data obtained by UV crosslinking of living yeast  
134 cells followed by stringent purification of poly(A)<sup>+</sup> mRNPs and mass spectrometry  
135 (Beckmann et al., 2015). Just four tRNA modifying enzymes – Pus1, Pus7, Dus3 and  
136 Trm44 – were found to be mRNA-associated. Two of these, the pseudouridine  
137 synthases Pus1 and Pus7, are known to modify dozens of mRNA targets (Carlile et al.,  
138 2014; Schwartz et al., 2014). In contrast, the known targets of Dus3 and Trm44 are  
139 restricted to tRNAs. Given the broad potential for mRNA 2'-O-methylation to affect  
140 mRNA metabolism, we selected Trm44 for further study.

141

142 To identify specific mRNAs that interact with Trm44, we performed in vivo UV  
143 crosslinking (CL) followed by limited RNase digestion, immunoprecipitation (IP) of HPM-  
144 tagged protein expressed from the endogenous *TRM44* locus (Trm44-HPM; Table S1),  
145 and Illumina sequencing of the associated RNA fragments (Figure 1A; STAR Methods).  
146 As expected, radiolabeling of the crosslinked immunoprecipitated RNA-protein  
147 complexes (RNP) showed a prominent band of the predicted size for Trm44-HPM bound  
148 to an intact tRNA, which was not present in control IPs from an untagged strain (Figure  
149 S1B). We generated CLIP libraries from these samples using an enhanced protocol  
150 (eCLIP-Seq) that increases the number of non-PCR duplicate reads (Van Nostrand et  
151 al., 2016). In parallel, we prepared a size-matched input (SMI) library to control for  
152 abundant RNA fragments that contribute to non-specific background signal (STAR  
153 Methods). This comparison is important for identifying true binding sites as normalization

154 of eCLIP reads to SMI has been shown to eliminate >90% of putative RBP binding sites  
155 as false positives (Conway et al., 2016; Van Nostrand et al., 2016).  
156  
157 Consistent with the known methylation targets of Trm44, reads mapping to tRNA were  
158 enriched >10-fold in the Trm44-HPM eCLIP libraries compared to SMI while reads  
159 mapping to rRNA were depleted >50-fold (Table S2). Among tRNA eCLIP reads there  
160 was a striking enrichment for 6 tRNAs compared to SMI: 5 tRNA<sup>Ser</sup> that are known to be  
161 methylated by Trm44 and 1 computationally predicted tRNA of undetermined specificity  
162 that is very similar to serine tRNAs (Figure 1B) (Kotelawala et al., 2007; Lowe and Eddy,  
163 1997). Next we applied the CLIPper algorithm (Lovci et al., 2013) to identify clusters of  
164 CLIP-Seq reads and computed the enrichment of each cluster in IP compared to SMI  
165 (STAR Methods). Using stringent enrichment criteria ( $p \leq 0.001$  and  $\geq 4$ -fold enriched  
166 versus SMI), we identified 33 high-confidence Trm44 binding sites, 60% of which were  
167 located in various tRNA<sup>Ser</sup>. 3 stringent clusters were identified in mRNA, with 26  
168 additional mRNA clusters showing enrichment at relaxed cutoffs (Figure 1C; Table S3).  
169 As a further control, we compared Trm44-HPM eCLIP peaks to Pus1-HPM, which bound  
170 a large set of tRNAs as expected and did not significantly enrich the Trm44 mRNA  
171 binding sites (Figure S1C; Table S4). These results demonstrate that Trm44 interacts  
172 with specific mRNA sites in vivo and suggests that mRNA could be 2'-O-methylated.

173

#### 174 **Discovery of mRNA Binding Sites for Trm3, Trm7 and Trm13 by eCLIP-Seq**

175 Because mRNP interactome analysis did not identify all tRNA modifying pseudouridine  
176 synthases with known mRNA pseudouridylation targets, we reasoned that additional  
177 tRNA 2'-O-methyltransferases might associate with specific mRNAs in vivo. We  
178 therefore performed eCLIP-Seq on yeast strains expressing HPM-tagged versions of  
179 Trm3, Trm7 and Trm13 under their native promoters with SMI controls for each (Figure

180 S1D). As expected, tRNA mapping reads were enriched in these eCLIP libraries (Table  
181 S2). CLIPper peak discovery and normalization to SMI identified stringent peaks for  
182 each Trm protein ( $p \leq 0.001$  and  $\geq 4$ -fold enriched versus SMI; STAR Methods), and  
183 most known methylation targets were enriched including tRNA<sup>His</sup>, tRNA<sup>Leu</sup>, tRNA<sup>Ser</sup>, and  
184 tRNA<sup>Tyr</sup> for Trm3; tRNA<sup>Leu</sup>, tRNA<sup>Phe</sup>, and tRNA<sup>Trp</sup> for Trm7; and tRNA<sup>Gly</sup>, tRNA<sup>His</sup>, and  
185 tRNA<sup>Pro</sup> for Trm13 (Figures S1E-S1G; Tables S5-S7). In addition, these eCLIPs each  
186 produced numerous stringent peaks that mapped to specific mRNA sites distinct from  
187 one another and from Trm44-HPM (Figures 1D-1I; Tables S3 and S5-S7). Thus, each of  
188 the tRNA 2'-O-methyltransferases interacts with specific mRNAs in vivo in addition to  
189 their canonical tRNA targets.

190

191 We also identified stringent peaks in non-coding RNAs not known to be methylation  
192 targets of the Trm enzymes. A substantial fraction of significantly enriched non-coding  
193 RNA peaks occurred in other tRNAs (Tables S3 and S5-S7). Moreover, in a few cases,  
194 such as tRNA<sup>Ser</sup> crosslinking to Trm7 and tRNA<sup>Val</sup> crosslinking to Trm13, non-target  
195 tRNAs showed reproducible enrichment that was comparable to canonical targets  
196 (Figure S1F and S1G; Tables S6 and S7). Overall, each of the Trm proteins displayed in  
197 vivo tRNA binding specificity that was similar but not identical to their known substrate  
198 specificities for tRNA methylation. There is precedent for tRNA modifying enzymes to  
199 bind with high affinity to tRNAs they do not modify (Keffer-Wilkes et al., 2016; Müller et  
200 al., 2013) and our data highlight particular tRNAs for future investigations of the tRNA  
201 features that distinguish modification substrates from non-substrates. A few Trm  
202 crosslink peaks were observed in nuclear non-coding RNAs (Tables S5-S7). However, it  
203 has been noted that certain non-coding RNAs, particularly snoRNAs, appear as frequent  
204 hits in eCLIP-Seq experiments even after SMI normalization, and so such peaks should  
205 be interpreted with caution (Van Nostrand et al., 2016). Together, these transcriptome-



206 wide crosslinking results show that the known tRNA 2'-O-methyltransferases in yeast  
207 interact with diverse RNAs in vivo and have the potential to modify hundreds of  
208 additional substrates including mRNAs.

209

### 210 **Transcriptome-wide Mapping of 2'-O-Methyl Ribose with MeTH-seq**

211 To determine whether yeast mRNAs contain 2'-O-methyl ribose (Nm) and define the  
212 global landscape of ribose methylation, we developed sequencing of methylation at two  
213 prime hydroxyls, MeTH-seq, a high-throughput approach to map Nm sites with single-  
214 nucleotide resolution. Nm causes reverse transcriptase (RT) to pause one nucleotide 3'  
215 to the methylated site, a pause that can be selectively enhanced by limiting the  
216 availability of deoxyribonucleotides (Maden et al., 1995) or magnesium ( $Mg^{2+}$ ) in the  
217 reaction (Figure S2A). We exploited this effect to map the locations of likely Nm sites  
218 using next-generation sequencing to identify  $Mg^{2+}$ -sensitive RT pause sites (Figure 2A;  
219 STAR Methods). Different reverse transcriptases and reaction conditions were  
220 compared to optimize the sensitivity and specificity of MeTH-seq to identify known 2'-O-  
221 methylated sites in rRNA (Figure S2A and S2B). Limiting  $Mg^{2+}$  produced slightly better  
222 results than limiting dNTPs (Figure S2A). tRNA sites were not considered in this analysis  
223 as tRNAs are poorly captured by most RNA-Seq library protocols including ours.

224

225 MeTH-seq produced clear peaks of reads one nucleotide 3' of known locations of Nm in  
226 rRNA (Figure 2B-2D). Deletion of specific methylation-directing small nucleolar RNAs  
227 (snoRNA) eliminated MeTH-seq peaks at their corresponding rRNA target sites (Figure  
228 S2C), further confirming the ability of our method to detect Nm sites with single-  
229 nucleotide resolution. We used the rRNA data from wild type cells to establish stringent  
230 criteria for de novo Nm identification from MeTH-seq data (STAR Methods). 33 out of 55  
231 annotated Nm sites in rRNA were called under these criteria (Table S8; annotations from

232 (Piekna-Przybylska et al., 2007) with the addition of Gm562 in 18S identified by mass  
233 spectrometry (Yang et al., 2015). As expected, the MeTH-seq peak caller missed some  
234 Nm sites immediately 5' of other Nm sites, such as Gm805/Am807 in 25S, due to  
235 'shadowing' from the downstream site (Table S8). MeTH-seq profiling of wild type yeast  
236 ribosomes revealed two likely Nm misannotations: instead of 18S Gm1428 and 25S  
237 Am1449, MeTH-seq produced clear signals one nucleotide 5' to the annotated sites, at  
238 Am1427 and Um1448 respectively (Figure S2D). Inspection of previously published  
239 primer extension gels supports these changes to the annotations, while a third potential  
240 correction (Cm1639 to Gm1638) could not be confirmed or ruled out (gel images  
241 available at <http://lowelab.ucsc.edu/snoRNAdb/Sc/Sc-snos-bysite.html>). After these  
242 corrections, Nm sites in rRNA were called with an observed false positive rate of 0.35%  
243 (Table S8; STAR Methods). The false positive peaks at Um795 in the 18S and Am816 in  
244 the 25S rRNA can be attributed to 'stuttering' of RT at Am796 and Am817 (Motorin et al.,  
245 2007). A strong Mg<sup>2+</sup>-sensitive RT pause site was observed at 18S U1191, which  
246 contains a complex RNA modification, m1acp3Y. A few false positive peaks were found  
247 within broader regions of frequent RT pauses that may be due to stable RNA structure.  
248 The remaining false positive peaks were qualitatively and quantitatively indistinguishable  
249 from peaks at known Nm (Figure S2E and data not shown; Table S8). Importantly, none  
250 of the false positive peaks was affected by deletion of snoRNAs (snR72-78). Thus, in  
251 subsequent analysis, we required genetic dependence on a 2'-O-methyltransferase to  
252 confidently classify a MeTH-seq peak as an Nm site.

253

254 Peak heights in rRNA were reproducible between replicates but varied 10-fold between  
255 Nm sites whereas the level of methylation likely differs by no more than 2-fold based on  
256 mass spectrometry (Figure S2F (Yang et al., 2015). Sequence context is thought to  
257 affect the extent of RT pausing at 2'-O-methylated nucleotides (Motorin et al., 2007), and

258 capture biases during RNA-seq library preparation are well known (Raabe et al., 2014).  
259 In particular, our approach likely underestimates methylation at NmC and NmG sites  
260 (Figure S2G), which may be due to known CircLigase sequence preferences (Lamm et  
261 al., 2011). Thus, MeTH-seq peak heights cannot be meaningfully compared between  
262 different Nm sites but may be used for relative quantitation of methylation at a given site  
263 under different cellular conditions or genetic backgrounds.

264

### 265 **Thousands of Candidate Sites for Regulated 2'-O-Methyl Ribose within mRNAs**

266 Having demonstrated the suitability of MeTH-seq for de novo discovery of Nm sites, we  
267 performed MeTH-seq on poly(A)-selected yeast mRNAs during exponential growth in  
268 rich medium ( $A_{600\text{ nm}} = 1.0$ ). Given that the stoichiometry of methylation at known rRNA  
269 sites is near 100% (Yang et al., 2015), we reasoned that requiring a peak height  $\geq 4$   
270 would miss partially methylated sites. The minimum peak height was therefore set as 2.0  
271 for subsequent analyses of potential mRNA 2'-O-methylation. 6,734 sites in 1,947  
272 mRNAs showed a MeTH-seq peak height  $\geq 2.0$  in at least 13 out of 16 independent  
273 experiments (Figure 3A and 3B; Table S9). However, because we expect more false  
274 positives with lower peak heights (Table S10), we subsequently imposed the additional  
275 requirement that a peak be genetically dependent on a 2'-O-methyltransferase to be  
276 called an Nm site. Relaxing the criteria for Nm identification further, by reducing the  
277 requirements for minimum peak height or number of replicates, identified thousands of  
278 additional candidate sites (data not shown). Overall, global MeTH-seq profiling suggests  
279 Nm may be a prevalent modification in mRNA as well as non-coding RNA, a view  
280 supported by genetic evidence as described below.

281

282 Pseudouridine and m<sup>6</sup>A are dynamically regulated mRNA modifications that respond to  
283 nutrient availability and other stresses in yeast (Carlile et al., 2014; Schwartz et al.,  
284 2013, 2014). To investigate the possibility of regulated Nm sites, we compared MeTH-  
285 seq profiles from exponential and post-diauxic phases of growth, two growth states that  
286 differ substantially in gene expression and metabolic activity (Figure S3A and S3B). De  
287 novo Nm discovery in post-diauxic cultures ( $A_{600\text{ nm}} = 12$ ) identified 7,900 candidate sites  
288 in mRNAs with a MeTH-seq peak  $\geq 2.0$  in at least 16 out of 20 independent libraries  
289 (Table S11), of which 3,981 were also identified in log phase cultures (Figures 3C).  
290 Differences in mRNA abundance do not explain condition-dependent detection of most  
291 Nm sites (Figure S3C). Together, these MeTH-seq data suggest extensive 2'-O-  
292 methylation of mRNA targets that can be regulated in response to environmental  
293 changes.

294

### 295 **Identification of Trm-Dependent 2'-O-Methyl Ribose Sites in mRNAs**

296 The widespread distribution of MeTH-seq peaks together with the evidence that Trm  
297 methyltransferases interact with hundreds of yeast mRNAs in vivo suggests that mRNAs  
298 could be heavily decorated with 2'-O-methyl ribose. However, the unexplained MeTH-  
299 seq peaks ( $\text{Mg}^{2+}$ -sensitive RT pause sites) in rRNA indicates the potential for detection  
300 of RNA features or modifications other than Nm in mRNAs. We therefore sought genetic  
301 evidence that mRNAs are modified by 2'-O-methyltransferases at the sites identified by  
302 MeTH-seq.

303

304 We profiled deletion strains lacking each of the four tRNA 2'-O-methyltransferases and  
305 identified high-confidence Trm-dependent Nm sites based on reproducible loss of  
306 MeTH-seq signal in independent biological replicates of *TRM* deletion mutants (STAR  
307 Methods). As expected, deletion of *TRM44* (*trm44Δ*) eliminated signal from Um44 in

308 tRNA<sup>Ser</sup> (Figure 3D). *TRM13*-dependent methylation of the acceptor stems of tRNA<sup>Gly</sup>,  
309 tRNA<sup>His</sup>, and tRNA<sup>Pro</sup> could not be assessed because the target nucleotides were too  
310 close to the 5' ends of the tRNAs. Likewise, known Trm7 tRNA target sites were not  
311 called as MeTH-seq peaks, likely due to the presence of RT-blocking m1A modifications  
312 3' to Nm32 and Nm34. However, these technical limitations should not affect genetic  
313 assignment to a particular 2'-O-methyltransferase of sites already identified by MeTH-  
314 seq.

315

316 MeTH-seq profiling of *trmΔ* strains identified new RNA methylation targets for each of  
317 the Trm proteins in log phase and post-diauxic cells. The largest total number of mRNA  
318 candidate Nm sites were assigned to Trm44 (Figures 3D and 3E; Table S12), which is  
319 consistent with the presumed greater abundance of Trm44 in poly(A)<sup>+</sup> RNPs (Beckmann  
320 et al., 2015). The relatively low number of *TRM3*-dependent sites, particularly in log  
321 phase, was unexpected given the widespread mRNA association observed by eCLIP  
322 (Figure 1H). This may reflect technical limitations of the MeTH-seq approach or binding  
323 interactions that do not result in modification (Discussion). Overall, our data show that,  
324 like the Pus proteins, yeast Trm proteins target specific mRNAs for modification. Thus,  
325 'moonlighting' activity towards mRNAs may be a common characteristic among tRNA  
326 modifying enzymes.

327

### 328 **Conserved rRNA 2'-O-Methyltransferase Spb1 Targets mRNAs**

329 The majority of candidate Nm peaks were unaffected by deletion of TRMs, suggesting  
330 additional 2'-O-methyltransferases may have a role in modifying mRNA. We considered  
331 each of the four yeast proteins with validated rRNA 2'-O-methylation target sites: Nop1,  
332 Spb1, Mrm1 and Mrm2. Nop1 selects its 18S and 25S rRNA targets through base  
333 pairing with a C/D snoRNA guide, which allows computational prediction of potential

334 target sites. All mRNA candidate Nm sites from OD1 and OD12 were examined for  
335 possible base pairing with one of 48 snoRNAs followed by filtering for correct  
336 positioning of the Nm site at +5 with respect to the snoRNA D box (STAR Methods)  
337 (Kiss-László et al., 1996; Nicoloso et al., 1996). Sites positioned at +6 were also  
338 included as they are consistent with known snoRNA-directed methylation (e.g. 25S  
339 Cm650 targeted by snR18 and Gm1450 targeted by snR24 (Piekna-Przybylska et al.,  
340 2007)). Altogether, 10 novel Nm sites were identified as plausible targets of 7 snoRNAs  
341 (Figures 4A and 4B; Table S13), suggesting some limited interactions of yeast C/D  
342 snoRNAs outside their canonical rRNA targets.

343

344 We selected Spb1 for further characterization of the potential for mRNA methylation by  
345 rRNA modifying enzymes. Spb1 localizes to the nucleoplasm in addition to the nucleolus  
346 and thus has the potential to interact with nuclear mRNA (Kressler et al., 1999). In  
347 contrast, Mrm1 and Mrm2 localize to mitochondria where they methylate 21S  
348 mitochondrial rRNA (Breker et al., 2013; Pintard et al., 2002b; Sirum-Connolly and  
349 Mason, 1993). In addition to its canonical methylation target, 25S rRNA, we found by  
350 eCLIP that Spb1 crosslinked to numerous mRNAs (Figure S4A; Table S14). To identify  
351 *SPB1*-dependent sites of 2'-O-methylation, the essential *SPB1* gene was placed under  
352 control of a repressible *GAL1* promoter (*pGAL-SPB1*) and grown in glucose to inhibit  
353 *SPB1* expression prior to global MeTH-seq analysis in log phase (OD1) and post-diauxic  
354 cells (OD12) (Figure 4C; STAR Methods). As expected, prolonged cell culture in the  
355 absence of Spb1 reduced MeTH-seq signal at the known 25S target site, Gm2922, with  
356 a peak height of 0.9-1.3 in Spb1-depleted cells compared to  $2.6 \pm 0.7$  across all *SPB1*<sup>+</sup>  
357 libraries (Bonnerot et al., 2003; Lapeyre and Purushothaman, 2004). In addition, signal  
358 at 393 (OD1) and 129 (OD12) Nm sites was reproducibly diminished following depletion  
359 of Spb1 (Figure 4D; Tables S15 and S16). 87.5% of *SPB1*-dependent Nm sites mapped

360 to mRNAs of which 88.9% were Um (Figures 4E and 4F), which is consistent with the  
361 known ability of Spb1 to methylate uridine (Bonnerot et al., 2003; Lapeyre and  
362 Purushothaman, 2004). mRNA signal was strongly reduced following Spb1 depletion  
363 with 181/393 OD1 and 114/129 OD12 sites decreased  $\geq 4$ -fold (Tables S15 and S16). In  
364 contrast, rRNA sites affected by Spb1 depletion showed modest though reproducible  
365 reductions only in log phase, e.g. 25S Um1888 was reduced by  $\sim 20\%$  (Figure S4B-S4D;  
366 Table S14). Given that Um1888 and similarly affected rRNA sites are known targets of  
367 C/D snoRNAs, these reductions in methylation are likely to be indirect effects of Spb1  
368 depletion although we cannot exclude redundant targeting by Spb1 and snoRNAs  
369 (Bonnerot et al., 2003; Lapeyre and Purushothaman, 2004). Of the five tested 2'-O-  
370 methyltransferase, our data identify Spb1 as the predominant enzyme acting on mRNAs  
371 (Figure 4G).

372

### 373 **Distribution of 2'-O-Methyl Ribose within mRNA Coding Sequences**

374 *SPB1*-dependent MeTH-seq peaks were found in all regions of mRNAs with significant  
375 enrichment of sites in CDS (Bonferroni corrected Fisher's exact test  $p < 8.1e-9$ ) and  
376 depletion of sites from 3' UTRs ( $p < 1.4e-6$ ) (Figures 5A and 5B). Within coding regions  
377 Nm was detected in 41 out of 61 sense codons and 1 out of 3 stop codons with  
378 enrichment of specific A, I, L, V and M codons (Figure 5C, 5D and S5A; STAR Methods).  
379 18/33 methylated M codons were AUG initiation codons, accounting for the higher  
380 density of Nm at the start of CDS regions (Figure 5B). Nm sites were more frequently  
381 observed in the 3<sup>rd</sup> position of sense codons, a distribution of codon positions that  
382 differed significantly from a uniform background (Chi Square  $p < 2.2e-16$ ) (Figure 5E).  
383 Based on reported position-specific translational effects of Nm on translation in *E. coli*  
384 lysates (Hoernes et al., 2015), we analyzed ribosome footprint profiling data from wild  
385 type yeast or *dom34Δ* mutants defective in No-Go Decay (Gyudosh and Green, 2014)



386 but found no evidence of translation pausing at Nm sites either within ORF bodies or at  
387 start codons (Figure S5B-S5D; STAR Methods).

388

389 To explore potential mechanisms underlying mRNA recognition by Spb1, we examined  
390 its targets for enriched RNA motifs using MEME (Bailey et al., 2015). A motif rich in UG  
391 dinucleotides was notably enriched within a 50-nucleotide window surrounding *SPB1*-  
392 dependent Nm sites in mRNA (E value =  $1.7e-40$ ; Figure 5F; STAR Methods). This motif  
393 was present in 71/409 mRNA target sites while other significantly enriched motifs  
394 occurred much less frequently (Figure S5E). The UGNUGN motif was located at variable  
395 distances from the modified site (Figure S5F), which was almost invariantly U (Figure  
396 4F). Non-coding RNA targets of FtsJ methyltransferases, including Spb1, are modified  
397 on unpaired nucleotides within stem-loop structures (Guy and Phizicky, 2014), but the  
398 importance of this structure for Spb1 activity is unknown (Bonnerot et al., 2003; Lapeyre  
399 and Purushothaman, 2004). Using RNAsubopt to identify the probable structures of  
400 Spb1 targets (STAR Methods), we found that the modified sites were significantly likelier  
401 to be in the loop of a hairpin than a background set of sites. Similarly, positions  $\geq 4$  nt  
402 upstream or downstream of the site were significantly likelier to be involved in base  
403 pairing (Figures 5G and S5G). The basis for site-specific methylation by Spb1 remains to  
404 be determined and may involve distinct co-factors for different sites as shown for the  
405 related methyltransferase Trm7 (Guy and Phizicky, 2014).

406

#### 407 **Spb1 Methylates and Maintains Normal Levels of mRNAs Required for Ribosome** 408 **Assembly**

409 To gain insight into the biological roles of mRNA methylation by Spb1, gene ontology  
410 (GO) enrichment analysis was performed. GO terms related to ribosomes, ribosome  
411 biogenesis, and translation were almost exclusively over-represented (Figure 6A; Table



412 S17). These related GO term enrichments were driven by the presence of *SPB1*-  
413 dependent Nm sites in 97/139 (69%) mRNAs encoding cytoplasmic ribosomal proteins  
414 (RP mRNA). “Translational elongation” was also significantly enriched due to  
415 methylation of mRNAs encoding elongation factors EF-1 alpha (*TEF1/2*), EF-1B (*TEF4*),  
416 EF-2 (*EFT1*), and eIF-5A (*HYP2*) in addition to proteins of the ribosomal stalk (*RPP1A/B*  
417 and *RPP2A/B*) that promote recruitment of elongation factors to ribosomes (Gonzalo and  
418 Reboud, 2003). Thus, Spb1 targets a coherent regulon of factors required for ribosome  
419 assembly and function that includes both its canonical pre-rRNA substrate and  
420 numerous RP mRNAs.

421  
422 What might be the function of mRNA modification by Spb1? To determine whether loss  
423 of Spb1 affects the abundance of its target RNAs we performed RNA-seq on Spb1-  
424 depleted and control cells (STAR Methods). In wild type cells, Spb1 target mRNAs were  
425 highly expressed with a median TPM (transcripts per million) of 608.5 compared to 15.5  
426 TPM for all genes with adequate read coverage for MeTH-seq analysis (KS test  $p <$   
427  $2.2e-16$ ; Figure S6A). Depletion of Spb1 lead to significantly decreased abundance of  
428 most targets, with somewhat larger changes for mRNAs containing multiple Nm sites  
429 (Figure 6B and 6C). RP target mRNAs showed the largest reductions (Figure 6D).  
430 Although some of this difference may stem from global effects of Spb1 depletion on RP  
431 expression (Figure S6B), target RP mRNAs were significantly reduced compared to non-  
432 target RP mRNAs (KS test,  $p < 5.9e-15$ ; Figure S6C). This reduction in mRNA target  
433 levels following methyltransferase depletion was specific to Spb1: Trm44 targets  
434 increased slightly in *trm44Δ* (KS test,  $p < 5.7e-7$ ; Figure S6D and targets of the other  
435 methyltransferases were not significantly affected by the corresponding knockout (data  
436 not shown). These data show that *SPB1* is required to maintain the levels of its target  
437 mRNAs and suggest Spb1-dependent mRNA methylation may promote mRNA stability.

438 Because a majority of cytoplasmic ribosomal protein mRNAs are targets of *SPB1*-  
439 dependent methylation, the role of *SPB1* in ribosome biogenesis is likely to be broader  
440 than previously appreciated (Discussion).

441

## 442 **DISCUSSION**

443 Here we identify Spb1 as a conserved methyltransferase that modifies hundreds of yeast  
444 mRNAs with 2'-O-methyl ribose (Nm). We further show that *SPB1* expression is required  
445 to maintain normal levels of Spb1 target RNAs including most mRNAs encoding  
446 ribosomal proteins. Our results expand the known epitranscriptome and establish  
447 methods to discover Nm sites transcriptome-wide and illuminate the mechanisms  
448 underlying regulation of this novel mRNA modification that is likely to be conserved  
449 throughout evolution.

450

### 451 **Detection of 2'-O-methyl Ribose – Methods and Limitations**

452 Three next-generation sequencing methods for Nm profiling have recently been  
453 described. Our MeTH-seq library preparation is very similar to the 2OMe-seq method  
454 used to identify new Nm sites in mammalian ribosomes (Incarnato et al., 2017), but limits  
455  $Mg^{2+}$  rather than dNTPs during reverse transcription, which we found to modestly  
456 improve selectivity for Nm. The RiboMethSeq approach exploits the resistance of 2'-O-  
457 methylated sites to hydrolysis (Krogh et al., 2016; Marchand et al., 2016). An advantage  
458 of this method is the possibility to determine the absolute stoichiometry of modification at  
459 specific positions by quantifying the depletion of 3' and 5' read ends. However, very high  
460 read depth is required to observe depletion of reads at an Nm site making it costly for  
461 transcriptome-wide profiling. The Nm-seq method exploits the differential reactivity of  
462 Nm to periodate oxidation for selective capture of RNA fragments with Nm 3' ends (Dai  
463 et al., 2017). Pre-enrichment of Nm-containing RNA fragments (e.g. with an antibody)

464 prior to MeTH-seq, 2OMe-seq or RiboMethSeq would allow comprehensive Nm  
465 discovery, with single-nucleotide resolution, at much lower sequencing depth. However,  
466 enrichment of modified RNA fragments prior to sequencing, which is standard in m6A  
467 and m1A profiling studies, may result in capture of RNAs that are modified at very low  
468 stoichiometry and have uncertain physiological relevance. In contrast, as implemented  
469 here, our approach requires RT to pause on a substantial fraction of total RNA  
470 molecules to detect a peak for a given Nm site.

471

472 MeTH-seq may not capture all 2'-O-methylated sites. It is notable that MeTH-seq  
473 identified relatively few *TRM3*-dependent Nm sites despite the widespread mRNA  
474 association of Trm3 observed by eCLIP. Remarkably, >96% of high-confidence binding  
475 sites identified in the Trm3 eCLIP libraries mapped to mRNAs. Altogether, we identified  
476 1611 stringent peaks in 975 mRNAs in addition to 29 stringent peaks that mapped to 19  
477 tRNAs. Such pervasive mRNA binding by Trm3 was unexpected, and the basis for it is  
478 not immediately apparent. Trm3 does not have known RNA-binding domains outside the  
479 conserved methyltransferase catalytic domain. Furthermore, Trm3 is not more highly  
480 expressed than the other tRNA 2'-O-methyltransferases (Ghaemmaghami et al., 2003;  
481 Kulak et al., 2014), and all four HPM-tagged Trm proteins were immunoprecipitated with  
482 similar efficiency. Given that Trm3 methylates its canonical tRNA target sites in the  
483 context GmG, this discrepancy between detection of binding and modification may  
484 reflect false negatives due to sequence capture bias in the MeTH-seq protocol.

485 Specifically, truncated cDNAs ending in C are inefficiently circularized by CirLigase  
486 (Lamm et al., 2011). In addition, the true methylation targets may interact with Trm3 very  
487 transiently and therefore be poorly captured by CLIP. Alternatively, Trm3 crosslinking  
488 may enrich for deadenylated mRNAs that were not examined by our profiling of Nm sites  
489 in poly(A)<sup>+</sup> RNA. There is also precedent for tRNA modifying enzymes to bind with high

490 affinity to non-substrate RNAs, perhaps to affect RNA folding (Keffer-Wilkes et al., 2016;  
491 Müller et al., 2013).

492

493 The majority of highly reproducible MeTH-seq peaks (those present in at least 13  
494 independent samples) identified here were not affected by depletion of known 2'-O-  
495 methyltransferases. As the TRM methyltransferases and Spb1 do not modify one  
496 another's non-coding RNA targets in vivo, we consider widespread redundant targeting  
497 of mRNA sites by these enzymes to be unlikely. The mitochondrial enzymes Mrm1 and  
498 Mrm2, whose modification targets were not determined in our study, conceivably  
499 methylate cytoplasmic mRNAs either en route to the mitochondria or from a cytoplasmic  
500 pool of protein (Breker et al., 2013). Consistent with this possibility, it is interesting that  
501 the ortholog of Mrm1 crosslinks to poly(A)<sup>+</sup> RNA in human cells (Baltz et al., 2012;  
502 Castello et al., 2012). In addition, the *S. cerevisiae* genome encodes multiple predicted  
503 RNA methyltransferases of unknown activities (Wlodarski et al., 2011), which potentially  
504 include additional mRNA 2'-O-methyltransferases.

505

506 However, although other known or putative RNA methyltransferases may install Nm in  
507 mRNA, it is likely that other RNA features, such as structure, can give rise to  
508 reproducible Mg<sup>2+</sup>-sensitive RT pause sites in the absence of 2'-O-methylation. In any  
509 sequencing library preparation there is the potential for robust artefacts, such as  
510 mispriming during reverse transcription (Gillen et al., 2016), which may explain the  
511 enrichment of a primer sequence motif among candidate Nm sites proposed from  
512 Nmseq data (Dai et al., 2017). Therefore, we do not interpret MeTH-seq peaks as Nm  
513 sites in the absence of genetic validation. The remaining potential mRNA 2'-O-  
514 methyltransferases need to be tested before the complete Nm landscape can be known  
515 in yeast.

516

### 517 **Conservation of mRNA 2'-O-methylation**

518 While our study was being finalized, He and colleagues reported the presence of Nm in  
519 mRNA from human cells based on mass spectrometry and sequencing-based  
520 approaches, although they did not identify the methyltransferases responsible (Dai et al.,  
521 2017). Each of the mRNA modifying yeast methyltransferases characterized here is  
522 conserved to man. Notably, FTSJ3, which is the human ortholog of Spb1, here identified  
523 as a predominant mRNA methyltransferase in yeast, has been found in the poly(A)<sup>+</sup>  
524 mRNP interactomes of multiple human cell lines (Baltz et al., 2012; Beckmann et al.,  
525 2015; Castello et al., 2012). Proteomic characterization of FTSJ3 co-immunoprecipitates  
526 identified 10 hnRNP proteins providing further evidence that FTSJ3, like Spb1, may  
527 interact with nuclear mRNA (Simabuco et al., 2012). Our analysis also suggests some  
528 mRNAs are targeted by the snoRNA-directed methyltransferase Nop1, whose human  
529 counterpart fibrillarin was likewise found to crosslink to poly(A)<sup>+</sup> human RNA. Although  
530 the reported locations of Nm in human mRNA have been called into question based on  
531 the apparent mispriming artefact described above, mass spec analysis establishes 2'-O-  
532 methylated nucleotides as abundant in purified bulk human mRNA (Dai et al., 2017).  
533 Furthermore, Um was by far the most abundant with a molar ratio of 0.15% for Um/U,  
534 which is consistent with the predominance of Um among genetically validated Spb1-  
535 dependent Nm sites. Thus, we conclude that 2'-O-methyl ribose is conserved as an  
536 mRNA modification in diverse eukaryotes and suggest that the mRNA methylation  
537 activity of Spb1/FTSJ3 in particular is likely to be conserved.

538

### 539 **Functional consequences of Nm in mRNA**

540 We found that depletion of Spb1 led to substantial reductions in the levels of its mRNA  
541 targets, which suggests endogenous Nm could promote mRNA stability. 2'-O-methylated

542 nucleotides are widely used in synthetic small interfering RNA (siRNA) due to their  
543 resistance to degradation by various nucleases (Czuderna et al., 2003; Sproat et al.,  
544 1989). However, it is unclear how the presence of sparse Nm residues within coding  
545 sequences would stabilize an mRNA against exonucleolytic decay from the 5' or 3' end  
546 of the transcript. If Nm increases steady-state mRNA levels by conferring resistance to  
547 endonucleolytic cleavage at the modified site, this uncharacterized decay pathway must  
548 play a sizable role in yeast mRNA homeostasis. Alternatively, Nm may recruit a protein  
549 factor that promotes mRNA stabilization. Such a mechanism would be opposite to  
550 mRNA destabilization by m<sup>6</sup>A, which occurs through direct binding of YTHD family  
551 proteins to modified mRNA and subsequent recruitment of decay factors (Ke et al.,  
552 2017; Wang et al., 2014). Any Nm 'reader' likely recognizes the modified nucleotide in a  
553 broader sequence or structural context; recognition of additional RNA features could  
554 explain why loss of Nm affects the abundance of Spb1 targets specifically whereas loss  
555 of Nm did not decrease the levels of mRNAs targeted by other methyltransferases.  
556  
557 Consistent with this possibility, the presence of Nm has been found to affect interactions  
558 with several RNA binding proteins in both natural and artificial contexts (Devarkar et al.,  
559 2016; Lacoux et al., 2012; Lavoie and Abou Elela, 2008; Simon et al., 2011; Tian et al.,  
560 2011). With the exception of PAZ domains binding the 2'-O-methylated 3' ends of small  
561 RNAs, most characterized RNA binding protein interactions with 2'-O-methylated RNAs  
562 show reduced protein binding to modified RNA. In contrast, m<sup>6</sup>A is known to promote  
563 binding to multiple 'reader' proteins to mediate a variety of downstream effects on mRNA  
564 metabolism (Roignant and Soller, 2017; Yue et al., 2015). Our findings motivate the  
565 search for Nm readers and their functional interactions with mRNA decay pathways.  
566

567 We anticipated that mRNA 2'-O-methylation might impede translation elongation based  
568 on results with synthetic Nm containing mRNAs (Dunlap et al., 1971; Hoernes et al.,  
569 2015). We therefore analyzed ribosome footprint profiling data to determine ribosomal A  
570 site occupancy at modified codons. No pausing was observed either in wild type cells or  
571 in *dom34Δ* mutants that are defective in ribosome stalling-dependent No-Go Decay  
572 (Guydosh and Green, 2014) nor did deletion of *DOM34* increase steady-state levels of  
573 translating Nm-containing mRNAs. Given that Spb1 methylation targets are among the  
574 most highly expressed and efficiently translated mRNAs in growing yeast, it would be  
575 surprising if their expression were inhibited at the level of translation elongation.  
576 Furthermore, depletion of Spb1 decreased target mRNA levels, which is the opposite of  
577 what would be expected for a modification that slowed elongation (Hanson and Coller,  
578 2017). The lack of detectable ribosome pausing at Nm codons in vivo may reflect more  
579 robust translation elongation in cells compared to lysates. However, CAmA, which  
580 caused a 10-fold reduction in synthesis of full-length protein in *E. coli* lysates (Hoernes  
581 et al., 2015), was found infrequently among Nm-containing codons in yeast and the  
582 ribosome profiling sequencing depth was not sufficient to assess pausing at this small  
583 number of codons in isolation. Thus, we cannot exclude the possibility that specific Nm  
584 modified codons could inhibit elongation in cells.

585

### 586 **A Broader Role for Spb1 in Ribosome Biogenesis?**

587 A wealth of genetic and biochemical evidence implicates *SPB1* in ribosome biogenesis,  
588 but the essential function of the Spb1 protein in this process remained unclear. *SPB1*  
589 was originally characterized as one of seven Suppressors of Poly(A) Binding Protein that  
590 affect the levels of 60S ribosomal subunits in yeast (Sachs et al., 1987). Depletion of  
591 Spb1, which co-purifies with 66S pre-ribosomal particles, leads to accumulation of rRNA  
592 processing intermediates and depletion of mature 25S rRNA (Harnpicharnchai et al.,

593 2001; Kressler et al., 1999). The subsequent discovery that Spb1 methylates 25S rRNA  
594 revealed a molecular function for its conserved methyltransferase domain (Bonnerot et  
595 al., 2003; Lapeyre and Purushothaman, 2004). Mutating the predicted catalytic aspartate  
596 (*spb1-D52A*) abolished the 25S Gm2922 modification and produced a viable but  
597 severely growth impaired strain with greatly reduced 60S levels (Lapeyre and  
598 Purushothaman, 2004). However, it is remarkable for a single Nm site to be critical for  
599 ribosome biogenesis. Indeed, most yeast C/D snoRNAs can be deleted with little effect  
600 on growth. Thus, the apparent importance of Spb1-dependent RNA methylation for  
601 ribosome production and cell growth was puzzling.

602

603 Our work identified hundreds of new RNA targets for 2'-O-methylation by Spb1 that  
604 include the majority of mRNAs encoding cytoplasmic ribosomal proteins. Depletion of  
605 Spb1 led to significantly reduced levels of its mRNA targets consistent with a positive  
606 role for *SPB1* – and presumptively RP mRNA 2'-O-methylation – in ribosomal protein  
607 production. Spb1 modification targets included RP mRNAs encoding proteins of both  
608 ribosomal subunits, which could contribute to the reduction in 40S observed following  
609 longer depletion of Spb1 (Kressler et al., 1999). Of note, although the human ortholog  
610 FTSJ3 is also required for ribosome biogenesis, it contributes primarily to 40S  
611 production (Morello et al., 2011). It will be important to learn whether FTSJ3 similarly  
612 modifies RP mRNAs and determine how mRNA 2'-O-methylation affects RNA levels in  
613 human cells.

614

615

## 616 **ACKNOWLEDGEMENTS**

617 We thank E. Van Nostrand and G. Yeo for eCLIP advice; B. Waldman for help with  
618 MeTH-seq feasibility studies; C. Burge, E. Phizicky and members of the Gilbert Lab for



619 discussion. The sequencing was performed at the MIT BioMicro Center under the  
620 direction of S. Levine. This work was supported by grants from The American Cancer  
621 Society – Robbie Sue Mudd Kidney Cancer Research Scholar Grant (RSG-13-396-01-  
622 RMC) and the National Institutes of Health (GM094303, GM081399) to W.V.G. T.M.C.  
623 and K.M.B. were supported by fellowships from The American Cancer Society. C.S. was  
624 supported by an NSF GRF.

625

### 626 **AUTHOR CONTRIBUTIONS**

627 K.M.B. designed research and performed and analyzed MeTH-seq experiments. T.M.C.  
628 developed the MeTH-seq data analysis pipeline. C.S. designed and performed all other  
629 computational analyses. W.V.G. conceived the project, supervised research, designed  
630 research, and performed eCLIP. K.M.B., C.S. and W.V.G. interpreted the results. W.V.G.  
631 wrote the paper with input from all authors.

632

### 633 **DECLARATION OF INTERESTS**

634 The authors declare no competing interests.

635

### 636 **REFERENCES**

637 Bailey, T.L., Johnson, J., Grant, C.E., and Noble, W.S. (2015). The MEME Suite. *Nucleic*  
638 *Acids Res.* 43, W39–W49.

639

640 Bailey, T.L., Boden, M., Buske, F.A., Frith, M., Grant, CE. Clementi, L., Ren, J., Li,  
641 W.W., and Noble, W.S. (2009). MEME SUITE: tools for motif discovery and searching.  
642 *Nucleic Acids Res.* 37, W202–W208.

643

644 Baltz, A.G., Munschauer, M., Schwanhäusser, B., Vasile, A., Murakawa, Y., Schueler,

645 M., Youngs, N., Penfold-Brown, D., Drew, K., Milek, M., et al. (2012). The mRNA-Bound  
646 Proteome and Its Global Occupancy Profile on Protein-Coding Transcripts. *Mol. Cell* *46*,  
647 674–690.  
648  
649 Beckmann, B.M. (2017). RNA interactome capture in yeast. *Methods* *118–119*, 82–92.  
650  
651 Beckmann, B.M., Horos, R., Fischer, B., Castello, A., Eichelbaum, K., Alleaume, A.-M.,  
652 Schwarzl, T., Curk, T.T., Foehr, S., Huber, W., et al. (2015). The RNA-binding  
653 proteomes from yeast to man harbour conserved enigmRBPs. *Nat. Commun.* *6*, 10127.  
654  
655 Bonnerot, C., Pintard, L., and Lutfalla, G. (2003). Functional redundancy of Spb1p and a  
656 snR52-dependent mechanism for the 2'-O-ribose methylation of a conserved rRNA  
657 position in yeast. *Mol. Cell* *12*, 1309–1315.  
658  
659 Brar, G. a., Yassour, M., Friedman, N., Regev, A., Ingolia, N.T., and Weissman, J.S.  
660 (2012). High-Resolution View of the Yeast Meiotic Program Revealed by Ribosome  
661 Profiling. *Science* (80-. ). *335*, 552–557.  
662  
663 Bray, N.L., Pimentel, H., Melsted, P. and Pachter, L. (2016) Near-optimal probabilistic  
664 RNA-seq quantification, *Nat. Biotech.* *34*, 525-527.  
665  
666 Breker, M., Gymrek, M., and Schuldiner, M. (2013). A novel single-cell screening  
667 platform reveals proteome plasticity during yeast stress responses. *J. Cell Biol.* *200*,  
668 839–850.  
669

670 Butcher, S.E., and Pyle, A.M. (2011). The molecular interactions that stabilize RNA  
671 tertiary structure: RNA motifs, patterns, and networks. *Acc. Chem. Res.* *44*, 1302–1311.  
672

673 Carlile, T.M., Rojas-Duran, M.F., Zinshteyn, B., Shin, H., Bartoli, K.M., and Gilbert, W. V  
674 (2014). Pseudouridine profiling reveals regulated mRNA pseudouridylation in yeast and  
675 human cells. *Nature* *515*, 143–146.  
676

677 Carlile, T.M., Rojas-Duran, M.F., and Gilbert, W. V. (2015). Transcriptome-Wide  
678 Identification of Pseudouridine Modifications Using Pseudo-seq. *Curr. Protoc. Mol. Biol.*  
679 *112*, 4.25.1-4.25.24.  
680

681 Castello, A., Fischer, B., Eichelbaum, K., Horos, R., Beckmann, B., Strein, C., Davey, N.,  
682 Humphreys, D., Preiss, T., Steinmetz, L., et al. (2012). Insights into RNA Biology from an  
683 Atlas of Mammalian mRNA-Binding Proteins. *Cell* *149*, 1393–1406.  
684

685 Cavallé, J., Chetouani, F., and Bachellerie, J.P. (1999). The yeast *Saccharomyces*  
686 *cerevisiae* YDL112w ORF encodes the putative 2'-O-ribose methyltransferase catalyzing  
687 the formation of Gm18 in tRNAs. *RNA* *5*, 66–81.  
688

689 Conway, A.E., Van Nostrand, E.L., Pratt, G.A., Aigner, S., Wilbert, M.L., Sundararaman,  
690 B., Freese, P., Lambert, N.J., Sathe, S., Liang, T.Y., et al. (2016). Enhanced CLIP  
691 Uncovers IMP Protein-RNA Targets in Human Pluripotent Stem Cells Important for Cell  
692 Adhesion and Survival. *Cell Rep.* *15*, 666–679.  
693

694 Coyle, S.M., Gilbert, W. V., Doudna, J.A., Coyle SM, Gilbert WV, and Doudna JA (2009).  
695 Direct link between RACK1 function and localization at the ribosome in vivo. *Mol. Cell.*

696 Biol. 29, 1626–1634.

697

698 Czauderna, F., Fechtner, M., Dames, S., Aygün, H., Klippel, A., Pronk, G.J., Giese, K.,  
699 and Kaufmann, J. (2003). Structural variations and stabilising modifications of synthetic  
700 siRNAs in mammalian cells. *Nucleic Acids Res.* 31, 2705–2716.

701

702 Dai, Q., Moshitch-Moshkovitz, S., Han, D., Kol, N., Amariglio, N., Rechavi, G.,  
703 Dominissini, D., and He, C. (2017). Nm-seq maps 2'-O-methylation sites in human  
704 mRNA with base precision. *Nat. Methods* 14, 695–698.

705

706 Devarkar, S.C., Wang, C., Miller, M.T., Ramanathan, A., Jiang, F., Khan, A.G., Patel,  
707 S.S., and Marcotrigiano, J. (2016). Structural basis for m7G recognition and 2'-O-methyl  
708 discrimination in capped RNAs by the innate immune receptor RIG-I. *Proc. Natl. Acad.*  
709 *Sci.* 113, 596–601.

710

711 Dobin, A., Davis, C.A., Schlesinger, F., Drenkow, J., Zaleski, C., Jha, S., Batut,  
712 P., Chaisson, M., and Gingeras, T.R. STAR: ultrafast universal RNA-seq aligner. (2013).  
713 *Bioinformatics.* 1, 15-21.

714

715 Dunlap, B.E., Friderici, K.H., and Rottman, F. (1971). 2'-O-Methyl polynucleotides as  
716 templates for cell-free amino acid incorporation. *Biochemistry* 10, 2581–2587.

717

718 Ghaemmaghami, S., Huh, W.-K., Bower, K., Howson, R., Bower, K., Belle, A., Howson,  
719 R.W., Belle, A., Dephoure, N., O'Shea, E., et al. (2003). Global analysis of protein  
720 expression in yeast. *Nature* 425, 737–741.

721

722 Gilbert, W. V., Bell, T.A., and Schaening, C. (2016). Messenger RNA modifications:  
723 Form, distribution, and function. *Science* (80-. ). 352, 1408–1412.  
724  
725 Gillen, A.E., Yamamoto, T.M., Kline, E., Hesselberth, J.R., and Kabos, P. (2016).  
726 Improvements to the HITS-CLIP protocol eliminate widespread mispriming artifacts.  
727 *BMC Genomics* 17, 338.  
728  
729 Gonzalo, P., and Reboud, J.P. (2003). The puzzling lateral flexible stalk of the ribosome.  
730 *Biol. Cell* 95, 179–193.  
731  
732 Graumann, J., Dunipace, L.A., Seol, J.H., McDonald, W.H., Yates, J.R., Wold, B.J., and  
733 Deshaies, R.J. (2004). Applicability of tandem affinity purification MudPIT to pathway  
734 proteomics in yeast. *Mol. Cell. Proteomics* 3, 226–237.  
735  
736 Guy, M.P., and Phizicky, E.M. (2014). Two-subunit enzymes involved in eukaryotic post-  
737 transcriptional tRNA modification. *RNA Biol.* 11, 1608–1618.  
738  
739 Guydosh, N.R., and Green, R. (2014). Dom34 Rescues Ribosomes in 3' Untranslated  
740 Regions. *Cell* 156, 950–962.  
741  
742 Hanson, G., and Collier, J. (2017). Codon optimality, bias and usage in translation and  
743 mRNA decay. *Nat. Rev. Mol. Cell Biol.*  
744 Harnpicharnchai, P., Jakovljevic, J., Horsey, E., Miles, T., Roman, J., Rout, M.,  
745 Meagher, D., Imai, B., Guo, Y., Brame, C.J., et al. (2001). Composition and functional  
746 characterization of yeast 66S ribosome assembly intermediates. *Mol. Cell* 8, 505–515.  
747

748 Hoernes, T.P., Clementi, N., Faserl, K., Glasner, H., Breuker, K., Lindner, H.,  
749 Hüttenhofer, A., and Erlacher, M.D. (2015). Nucleotide modifications within bacterial  
750 messenger RNAs regulate their translation and are able to rewire the genetic code.  
751 *Nucleic Acids Res.*  
752  
753 Hou, Y.M., Zhang, X., Holland, J.A., and Davis, D.R. (2001). An important 2'-OH group  
754 for an RNA-protein interaction. *Nucleic Acids Res.* 29, 976–985.  
755  
756 Mi, H., Huang, X., Muruganujan, A., Tang, H., Mills, C., Kang, D., and Thomas,  
757 P.D. (2016). *Nucl. Acids. Res.* 45, 183-189.  
758  
759 Incarnato, D., Anselmi, F., Morandi, E., Neri, F., Maldotti, M., Rapelli, S., Parlato, C.,  
760 Basile, G., and Oliviero, S. (2017). High-throughput single-base resolution mapping of  
761 RNA 2'-O-methylated residues. *Nucleic Acids Res.*  
762  
763 Inoue, H., Hayase, Y., Imura, A., Iwai, S., Miura, K., and Ohtsuka, E. (1987). Synthesis  
764 and hybridization studies on two complementary nona(2'-o-methyl)ribonucleotides.  
765 *Nucleic Acids Res.* 15, 6131–6148.  
766  
767 Jones, S., Daley, D.T., Luscombe, N.M., Berman, H.M., and Thornton, J.M. (2001).  
768 Protein-RNA interactions: a structural analysis. *Nucleic Acids Res.* 29, 943–954.  
769  
770 Kawai, G., Yamamoto, Y., Kamimura, T., Masegi, T., Sekine, M., Hata, T., Iimori, T.,  
771 Watanabe, T., Miyazawa, T., and Yokoyama, S. (1992). Conformational rigidity of  
772 specific pyrimidine residues in tRNA arises from posttranscriptional modifications that

773 enhance steric interaction between the base and the 2'-hydroxyl group. *Biochemistry* 31,  
774 1040–1046.

775

776 Ke, S., Pandya-Jones, A., Saito, Y., Fak, J.J., Vågbø, C.B., Geula, S., Hanna, J.H.,  
777 Black, D.L., Darnell, J.E., and Darnell, R.B. (2017). m<sup>6</sup>A mRNA modifications are  
778 deposited in nascent pre-mRNA and are not required for splicing but do specify  
779 cytoplasmic turnover. *Genes Dev.* 31, 990–1006.

780

781 Keffer-Wilkes, L.C., Veerareddygar, G.R., and Kothe, U. (2016). RNA modification  
782 enzyme TruB is a tRNA chaperone. *Proc. Natl. Acad. Sci.* 113, 14306–14311.

783

784 Kiss, T. (2002). Small nucleolar RNAs: an abundant group of noncoding RNAs with  
785 diverse cellular functions. *Cell* 109, 145–148.

786

787 Kiss-László, Z., Henry, Y., Bachellerie, J.P., Caizergues-Ferrer, M., and Kiss, T. (1996).  
788 Site-specific ribose methylation of preribosomal RNA: a novel function for small  
789 nucleolar RNAs. *Cell* 85, 1077–1088.

790

791 Kotelawala, L., Grayhack, E.J., and Phizicky, E.M. (2007). Identification of yeast tRNA  
792 Um44 2'-O-methyltransferase (Trm44) and demonstration of a Trm44 role in sustaining  
793 levels of specific tRNA<sup>Ser</sup> species. *RNA* 14, 158–169.

794

795 Kotelawala, L., Grayhack, E.J., and Phizicky, E.M. (2008). Identification of yeast tRNA  
796 Um(44) 2'-O-methyltransferase (Trm44) and demonstration of a Trm44 role in sustaining  
797 levels of specific tRNA(Ser) species. *RNA* 14, 158–169.

798

799 Kressler, D., Rojo, M., Linder, P., and Cruz, J. (1999). Spb1p is a putative  
800 methyltransferase required for 60S ribosomal subunit biogenesis in *Saccharomyces*  
801 *cerevisiae*. *Nucleic Acids Res.* *27*, 4598–4608.  
802  
803 Krogh, N., Jansson, M.D., Häfner, S.J., Tehler, D., Birkedal, U., Christensen-Dalsgaard,  
804 M., Lund, A.H., Nielsen, H., Häfner, S.J., Tehler, D., et al. (2016). Profiling of 2'-O-Me in  
805 human rRNA reveals a subset of fractionally modified positions and provides evidence  
806 for ribosome heterogeneity. *Nucleic Acids Res.* *44*.  
807  
808 Kulak, N.A., Pichler, G., Paron, I., Nagaraj, N., and Mann, M. (2014). Minimal,  
809 encapsulated proteomic-sample processing applied to copy-number estimation in  
810 eukaryotic cells. *Nat. Methods* *11*, 319–324.  
811  
812 Lacoux, C., Di Marino, D., Boyl, P.P., Zalfa, F., Yan, B., Ciotti, M.T., Falconi, M., Urlaub,  
813 H., Achsel, T., Mougin, A., et al. (2012). BC1-FMRP interaction is modulated by 2'-O-  
814 methylation: RNA-binding activity of the tudor domain and translational regulation at  
815 synapses. *Nucleic Acids Res.* *40*, 4086–4096.  
816  
817 Lamm, A.T., Stadler, M.R., Zhang, H., Gent, J.I., and Fire, A.Z. (2011). Multimodal RNA-  
818 seq using single-strand, double-strand, and CircLigase-based capture yields a refined  
819 and extended description of the *C. elegans* transcriptome. *Genome Res.* *21*, 265–275.  
820  
821 Langmead, B. and Salzberg, S. (2012). Fast gapped-read alignment with Bowtie 2. *Nat.*  
822 *Meth.* *9*, 357-359.  
823  
824 Lapeyre, B., and Purushothaman, S.K. (2004). Spb1p-directed formation of Gm2922 in



825 the ribosome catalytic center occurs at a late processing stage. *Mol. Cell* 16, 663–669.

826

827 Lavoie, M., and Abou Elela, S. (2008). Yeast Ribonuclease III Uses a Network of

828 Multiple Hydrogen Bonds for RNA Binding and Cleavage <sup>†</sup>. *Biochemistry* 47, 8514–8526.

829

830 Lebars, I., Legrand, P., Aimé, A., Pinaud, N., Fribourg, S., and Di Primo, C. (2008).

831 Exploring TAR-RNA aptamer loop-loop interaction by X-ray crystallography, UV

832 spectroscopy and surface plasmon resonance. *Nucleic Acids Res.* 36, 7146–7156.

833

834 Li H.\*, Handsaker B.\*, Wysoker A., Fennell T., Ruan J., Homer N., Marth G., Abecasis

835 G., Durbin R. (2009). 1000 Genome Project Data Processing Subgroup. *Bioinformatics.*

836 25, 2078-2079.

837

838 Li, X., Xiong, X., and Yi, C. (2016). Epitranscriptome sequencing technologies: decoding

839 RNA modifications. *Nat. Methods* 14, 23–31.

840

841 Longtine, M.S., McKenzie, A., Demarini, D.J., Shah, N.G., Wach, A., Brachat, A.,

842 Philippsen, P., Pringle, J.R., Longtine MS, McKenzie A, et al. (1998). Additional modules

843 for versatile and economical PCR-based gene deletion and modification in

844 *Saccharomyces cerevisiae*. *Yeast* 14, 953–961.

845

846 Lorenz, R., Bernhart, S.H., Siederdissen, C.H., Tafer, H., Flamm, C., Stadler, P.F.,

847 Hofacker, I.L. (2013). ViennaRNA Package 2.0 Algorithms for Molecular Biology. *Nat.*

848 *Struct. Mol. Biol.* 6, 26.

849

850 Lovci, M.T., Ghanem, D., Marr, H., Arnold, J., Gee, S., Parra, M., Liang, T.Y., Stark, T.J.,

851 Gehman, L.T., Hoon, S., et al. (2013). Rbfox proteins regulate alternative mRNA splicing  
852 through evolutionarily conserved RNA bridges. *Nat. Struct. Mol. Biol.* *20*, 1434–1442.  
853

854 Love, M.I., Huber, W., and Anders, S. (2014). Moderated estimation of fold change and  
855 dispersion for RNA-seq data with DESeq2. *Genome Biology.* *15*, 550.  
856

857 Lovejoy, A.F., Riordan, D.P., and Brown, P.O. (2014). Transcriptome-wide mapping of  
858 pseudouridines: pseudouridine synthases modify specific mRNAs in *S. cerevisiae*. *PLoS*  
859 *One* *9*, e110799.  
860

861 Lowe, T.M., and Eddy, S.R. (1997). tRNAscan-SE: a program for improved detection of  
862 transfer RNA genes in genomic sequence. *Nucleic Acids Res.* *25*, 955–964.  
863

864 Machnicka, M.A., Milanowska, K., Osman Oglou, O., Purta, E., Kurkowska, M.,  
865 Olchowik, A., Januszewski, W., Kalinowski, S., Dunin-Horkawicz, S., Rother, K.M., et al.  
866 (2013). MODOMICS: a database of RNA modification pathways--2013 update. *Nucleic*  
867 *Acids Res.* *41*, D262-7.  
868

869 Maden, B.E., Corbett, M.E., Heeney, P.A., Pugh, K., and Ajuh, P.M. (1995). Classical  
870 and novel approaches to the detection and localization of the numerous modified  
871 nucleotides in eukaryotic ribosomal RNA. *Biochimie* *77*, 22–29.  
872

873 Majlessi, M., Nelson, N.C., and Becker, M.M. (1998). Advantages of 2'-O-methyl  
874 oligoribonucleotide probes for detecting RNA targets. *Nucleic Acids Res.* *26*, 2224–  
875 2229.  
876

877 Marchand, V., Blanloeil-Oillo, F., Helm, M., and Motorin, Y. (2016). Illumina-based  
878 RiboMethSeq approach for mapping of 2'-O-Me residues in RNA. *Nucleic Acids Res.* *44*,  
879 e135–e135.  
880  
881 Martin, M. Cutadapt removes adapter sequences from high-throughput sequencing  
882 reads. (2011). *EMBnet.journal.* *17*, 10-12.  
883  
884 Morello, L.G., Coltri, P.P., Quaresma, A.J.C., Simabuco, F.M., Silva, T.C.L., Singh, G.,  
885 Nickerson, J.A., Oliveira, C.C., Moore, M.J., and Zanchin, N.I.T. (2011). The Human  
886 Nucleolar Protein FTSJ3 Associates with NIP7 and Functions in Pre-rRNA Processing.  
887 *PLoS One* *6*, e29174.  
888  
889 Motorin, Y., Muller, S., Behm-Ansmant, I., and Branlant, C. (2007). Identification of  
890 Modified Residues in RNAs by Reverse Transcription-Based Methods. In *Methods in*  
891 *Enzymology*, pp. 21–53.  
892  
893 Müller, S., Windhof, I.M., Maximov, V., Jurkowski, T., Jeltsch, A., Förstner, K.U.,  
894 Sharma, C.M., Gräf, R., and Nellen, W. (2013). Target recognition, RNA methylation  
895 activity and transcriptional regulation of the *Dictyostelium discoideum* Dnmt2-homologue  
896 (DnmA). *Nucleic Acids Res.* *41*, 8615–8627.  
897  
898 Nicoloso, M., Qu, L.-H., Michot, B., and Bachellerie, J.-P. (1996). Intron-encoded,  
899 Antisense Small Nucleolar RNAs: The Characterization of Nine Novel Species Points to  
900 Their Direct Role as Guides for the 2'-O-ribose Methylation of rRNAs. *J. Mol. Biol.* *260*,

901 178–195.

902

903 Van Nostrand, E.L., Pratt, G.A., Shishkin, A.A., Gelboin-Burkhart, C., Fang, M.Y.,  
904 Sundararaman, B., Blue, S.M., Nguyen, T.B., Surka, C., Elkins, K., et al. (2016). Robust  
905 transcriptome-wide discovery of RNA-binding protein binding sites with enhanced CLIP  
906 (eCLIP). *Nat. Methods* 13, 1–9.

907

908 Pelechano, V., Wei, W., Jakob, P., and Steinmetz, L.M. (2014). Genome-wide  
909 identification of transcript start and end sites by transcript isoform sequencing. *Nat.*  
910 *Protoc.* 9, 1740–1759.

911

912 Phizicky, E.M., and Hopper, A.K. (2010). tRNA biology charges to the front. *Genes Dev.*  
913 24, 1832–1860.

914

915 Piekna-Przybylska, D., Decatur, W.A., and Fournier, M.J. (2007). New bioinformatic  
916 tools for analysis of nucleotide modifications in eukaryotic rRNA. *RNA* 13, 305–312.

917

918 Pintard, L., Lecointe, F., Bujnicki, J.M., Bonnerot, C., Grosjean, H., and Lapeyre, B.  
919 (2002a). Trm7p catalyses the formation of two 2'-O-methylriboses in yeast tRNA  
920 anticodon loop. *EMBO J.* 21, 1811–1820.

921

922 Pintard, L., Bujnicki, J.M., Lapeyre, B., and Bonnerot, C. (2002b). MRM2 encodes a  
923 novel yeast mitochondrial 21s rRNA methyltransferase. *EMBO J.* 21, 1139–1147.

924

925 Quinlan, A.R. and Hall, I.M. (2010). BEDTools: a flexible suite of utilities for comparing  
926 genomic features. *Bioinformatics.* 26, 842-842.

927

928 Raabe, C.A., Tang, T.-H., Brosius, J., and Rozhdestvensky, T.S. (2014). Biases in small  
929 RNA deep sequencing data. *Nucleic Acids Res.* *42*, 1414–1426.

930

931 Roignant, J.-Y., and Soller, M. (2017). m<sup>6</sup>A in mRNA: An Ancient Mechanism for Fine-  
932 Tuning Gene Expression. *Trends Genet.* *33*, 380–390.

933

934 Sachs, A.B., Davis, R.W., and Kornberg, R.D. (1987). A Single Domain of Yeast Poly (A  
935 )-Binding Protein Is Necessary and Sufficient for RNA Binding and Cell Viability. *J. Biol. Chem.* *262*,  
936 3268–3276.

937

938 Schaefer, M., Kapoor, U., and Jantsch, M.F. (2017). Understanding RNA modifications:  
939 the promises and technological bottlenecks of the epitranscriptome? *Open Biol.* *7*,  
940 170077.

941

942 Schwartz, S., Agarwala, S.D., Mumbach, M.R., Jovanovic, M., Mertins, P., Shishkin, A.,  
943 Tabach, Y., Mikkelsen, T.S., Satija, R., Ruvkun, G., et al. (2013). High-resolution  
944 mapping reveals a conserved, widespread, dynamic mRNA methylation program in  
945 yeast meiosis. *Cell* *155*, 1409–1421.

946

947 Schwartz, S., Bernstein, D.A., Mumbach, M.R., Jovanovic, M., Herbst, R.H., León-  
948 Ricardo, B.X., Engreitz, J.M., Guttman, M., Satija, R., Lander, E.S., et al. (2014).  
949 Transcriptome-wide Mapping Reveals Widespread Dynamic-Regulated  
950 Pseudouridylation of ncRNA and mRNA. *Cell* *159*, 148–162.

951

952 Simabuco, F.M., Morello, L.G., Aragão, A.Z.B., Paes Leme, A.F., and Zanchin, N.I.T.

953 (2012). Proteomic Characterization of the Human FTSJ3 Preribosomal Complexes. *11*.  
954 Simon, B., Kirkpatrick, J.P., Eckhardt, S., Reuter, M., Rocha, E.A., Andrade-Navarro,  
955 M.A., Sehr, P., Pillai, R.S., and Carlomagno, T. (2011). Recognition of 2'-O-Methylated  
956 3'-End of piRNA by the PAZ Domain of a Piwi Protein. *Structure* *19*, 172–180.  
957  
958 Sirum-Connolly, K., and Mason, T.L. (1993). Functional requirement of a site-specific  
959 ribose methylation in ribosomal RNA. *Science* *262*, 1886–1889.  
960  
961 Sproat, B.S., Lamond, A.I., Beijer, B., Neuner, P., and Ryder, U. (1989). Highly efficient  
962 chemical synthesis of 2'-O-methyloligoribonucleotides and tetrabiotinylated  
963 derivatives; novel probes that are resistant to degradation by RNA or DNA specific  
964 nucleases. *Nucleic Acids Res.* *17*, 3373–3386.  
965  
966 Stanley, S.E., Gable, D.L., Wagner, C.L., Carlile, T.M., Hanumanthu, V.S., Podlevsky,  
967 J.D., Khalil, S.E., DeZern, A.E., Rojas-Duran, M.F., Applegate, C.D., et al. (2016). Loss-  
968 of-function mutations in the RNA biogenesis factor NAF1 predispose to pulmonary  
969 fibrosis-emphysema. *Sci. Transl. Med.* *8*, 351ra107.  
970  
971 Tian, Y., Simanshu, D.K., Ma, J.-B., and Patel, D.J. (2011). Structural basis for piRNA 2'-  
972 O-methylated 3'-end recognition by Piwi PAZ (Piwi/Argonaute/Zwille) domains. *Proc.*  
973 *Natl. Acad. Sci.* *108*, 903–910.  
974  
975 Trapnell, C., Pachter, L., and Salzberg, S.L. (2009). TopHat: discovering splice junctions  
976 with RNA-Seq. *Bioinformatics.* *9*, 1105-1111.  
977  
978 Treger, M., and Westhof, E. (2001). Statistical analysis of atomic contacts at RNA-

979 protein interfaces. *J. Mol. Recognit.* *14*, 199–214.

980

981 Tsourkas, A., Behlke, M.A., and Bao, G. (2002). Hybridization of 2'-O-methyl and 2-

982 deoxy molecular beacons to RNA and DNA targets. *Nucleic Acids Res.* *30*, 5168–5174.

983 Wang, X., Lu, Z., Gomez, A., Hon, G.C., Yue, Y., Han, D., Fu, Y., Parisien, M., Dai, Q.,

984 Jia, G., et al. (2014). N6-methyladenosine-dependent regulation of messenger RNA

985 stability. *Nature* *505*, 117–120.

986

987 Wilkinson, M.L., Crary, S.M., Jackman, J.E., Grayhack, E.J., and Phizicky, E.M. (2007).

988 The 2'-O-methyltransferase responsible for modification of yeast tRNA at position 4.

989 *RNA* *13*, 404–413.

990

991 Winzeler, E.A., Shoemaker, D.D., Astromoff, A., Liang, H., Anderson, K., Andre, B.,

992 Bangham, R., Benito, R., Boeke, J.D., Bussey, H., et al. (1999). Functional

993 characterization of the *S. cerevisiae* genome by gene deletion and parallel analysis.

994 *Science* *285*, 901–906.

995

996 Wlodarski, T., Kutner, J., Towpik, J., Knizewski, L., Rychlewski, L., Kudlicki, A., Rowicka,

997 M., Dziembowski, A., and Ginalski, K. (2011). Comprehensive Structural and Substrate

998 Specificity Classification of the *Saccharomyces cerevisiae* Methyltransferome. *PLoS*

999 *One* *6*, e23168.

1000

1001 Yang, J., Sharma, S., Kötter, P., and Entian, K.-D. (2015). Identification of a new ribose

1002 methylation in the 18S rRNA of *S. cerevisiae*. *Nucleic Acids Res.* *43*, 2342–2352.

1003 Yue, Y., Liu, J., and He, C. (2015). RNA N6-methyladenosine methylation in post-

1004 transcriptional gene expression regulation. *Genes Dev.* *29*, 1343–1355.

1005

## 1006 **Material and Methods**

1007

### 1008 **CONTACT FOR REAGENT AND RESOURCE SHARING**

1009

1010 Further information and requests may be directed to and will be fulfilled by the Lead

1011 Contact, Wendy Gilbert ([wendy.gilbert@yale.edu](mailto:wendy.gilbert@yale.edu)).

1012

### 1013 **EXPERIMENTAL MODEL AND SUBJECT DETAILS**

1014

#### 1015 **Yeast strains and growth**

1016 All yeast strains are *Saccharomyces cerevisiae* BY4741 or BY4742 derivatives

1017 (BY4742:wild type (YWG11), BY4741:wild type (YWG506), *TRM44-HPM* (YWG1354),

1018 *PUS1-HPM* (YWG1357, YWG1358), *TRM3-HPM* (YWG1348, YWG1349), *TRM7-HPM*

1019 (YWG1350, YWG1351), *TRM13-HPM* (YWG1352, YWG1353), *SPB1-FLAG* (YWG1359,

1020 YWG1523), *snr72-78Δ* (YWG318, YWG372), *trm3Δ* (YWG1320, YWG1321), *trm7Δ*

1021 (YWG1322, YWG1323), *trm13Δ* (YWG1326, YWG1327), *trm44Δ* (YWG1324,

1022 YWG1325), *trm732Δ* (YWG1332, YWG1333), *rtt10Δ* (YWG1330, YWG1331), *pGAL1-*

1023 *HA-SPB1* (YWG1522, YWG1523). See Table S1 for complete genotypes. snoRNA

1024 deletions, *trm13Δ* and *pGAL-HA-SPB1* strains were made using PCR-based deletion

1025 cassettes (Longtine et al., 1998). Other deletion strains were obtained from the Yeast

1026 Deletion Collection (Winzeler et al., 1999). His-PrecisionProtease-MYC (HPM) tagged

1027 strains were made using PCR-based cassettes (Graumann et al., 2004). All strains, with

1028 the exception of *pGAL-HA-SPB1*, were grown at 30°C in YPAD (1% yeast extract, 2%

1029 peptone, 0.01% adenine hemisulphate, 2% glucose). Cultures for MeTH-seq were



1030 harvested by centrifugation in log phase ( $A_{600nm} \approx 1.0$ ) or at high density ( $A_{600nm} \approx 12.0$ ).

1031 High density *trm7* $\Delta$  cells were grown to  $A_{600nm} \approx 8.0$ .

1032

1033 The *pGAL-HA-SPB1* depletion strain was maintained at 30°C in YPARG (YPA  
1034 with 20% raffinose, 30% galactose). Cells were transferred to YPAD to inhibit expression  
1035 of *SPB1*. Log phase cells: Cells were grown to an  $A_{600nm} \approx 0.3$ , centrifuged and  
1036 resuspended in YPAD media for an additional 4-6 hours until  $A_{600nm} \approx 1.0$ . High density  
1037 cells: Cells were grown to an  $A_{600nm} \approx 3.0$ , centrifuged and resuspended in YPAD media  
1038 for an additional 8-12 hours until  $A_{600nm} \approx 12.0$ .

1039

1040 For ePAR-CLIP assays yeast were grown at 30°C in minimal media with reduced  
1041 uracil ( $SC_{Ura120\mu M}$ ) to an  $A_{600nm} = 0.4-0.5$ , supplemented with 4-thiouracil to a final  
1042 concentration of 500 $\mu$ M and cultured for 3 more hours before harvest as described  
1043 (Beckmann, 2017).

1044

1045

## 1046 **METHOD DETAILS**

1047

### 1048 **Yeast PAR-CLIP**

1049 Yeast strains expressing tagged methyltransferases from their endogenous loci were  
1050 cultured in the presence of 500 $\mu$ M 4-thiouracil. Cells were harvested by centrifugation,  
1051 resuspended in ice cold water, and UV irradiated on ice in a Stratalinker (365 nm,  
1052 energy = 7.2J/cm<sup>2</sup>). Crosslinked cells were washed in ice water, flash frozen in liquid N<sub>2</sub>,  
1053 and stored at -80°C until lysis. Cells were resuspended in 1.5 mL iCLIP lysis buffer (50  
1054 mM Tris-HCl pH7.4, 100 mM NaCl, 1% NP-40, 0.1% SDS, 0.5% sodium deoxycholate,

1055 1X protease inhibitor cocktail (Millipore), 400U/mL Murine RNase inhibitor (NEB)) per g  
1056 of cell pellet and lysed by vortexing with glass beads (Manufacturer). Lysates were  
1057 clarified by centrifugation, flash frozen in liquid N<sub>2</sub> and stored at -80°C.

1058

#### 1059 **eCLIP library preparation**

1060 eCLIP libraries were prepared as described (Van Nostrand et al., 2016). Briefly, lysates  
1061 were diluted in iCLIP lysis buffer to 26 ODU/2 mL and treated with Turbo DNase  
1062 (Lifetech) and RNase I (Lifetech) for 15min at 22°C before placing on ice. Treated  
1063 lysates were centrifuged (15,000 x g 15min) and added to Protein G magnetic beads  
1064 (Dynabeads) pre-bound with 10 µg of antibody (anti-Myc or anti-FLAG, Sigma) and  
1065 rotated for 2.5hr at 4°C. 4% of the binding reaction was saved as input before extensive  
1066 washing of bead-bound protein-RNA complexes. Bound RNA 3' ends were  
1067 dephosphorylated with FastAP (Lifetech) and PNK (NEB) before on-bead ligation of a 3'  
1068 RNA linker with T4 Rnl (NEB) at 16°C overnight. After washing, 10% of bound RNA was  
1069 labeled by PNK with <sup>32</sup>P ATP for diagnostic gels. The remainder was eluted from the  
1070 beads by incubation in 1X NuPAGE loading buffer with 0.1M DTT at 70°C for 10min.  
1071 CLIP eluates and paired inputs were electrophoresed on 4-12% Bis-Tris NuPAGE and  
1072 transferred to nitrocellulose membranes. Tagged protein MW was determined by  
1073 western blot of 2% input before CLIP and size-matched input (SMI) membranes were  
1074 cut, taking a 75kDa region just above the target protein size. RNA was released with  
1075 proteinase K, extracted with phenol:chloroform:isoamy alcohol, and purified on RNA  
1076 Clean & Concentrator-5 columns (Zymo). SMI RNA was dephosphorylated, a 3' linker  
1077 ligated, and purified on silane beads (Dynabeads). CLIP and SMI RNA was reverse  
1078 transcribed with SuperScript IV, hydrolyzed with NaOH, neutralized with HCl, and cDNA  
1079 was purified on silane beads. A 5' linker was ligated with T4 Rnl (NEB) overnight at  
1080 16°C. Linker-ligated cDNA was purified on silane beads before diagnostic PCRs to

1081 determine the minimum number of cycles. Final PCR products were gel-purified,  
1082 precipitated and sequenced on an Illumina HiSeq 2000.

1083

#### 1084 **RNA isolation**

1085 Total yeast RNA was isolated by hot acid phenol extraction followed by isopropanol  
1086 precipitation as described (Carlile et al., 2015). PolyA+ mRNA was isolated from 10-  
1087 15mg of yeast total RNA by two rounds of selection on oligo-dT cellulose beads  
1088 according to the manufacturer's instructions (NEB).

1089

#### 1090 **MeTH-seq library preparation**

1091 RNA fragmentation was performed in 10mM ZnCl<sub>2</sub> at 95°C for 55s. RNA fragments were  
1092 precipitated, dephosphorylated with CIP and PNK, and separated by denaturing (8%  
1093 urea-TBE) polyacrylamide gel electrophoresis (PAGE). Gel-purified RNA fragments (60-  
1094 70nt, 70-80nt, 80-90nt) were eluted overnight with rocking in RNA elution buffer (300mM  
1095 NAOAc pH 5.5, 1mM EDTA, 100 U/ml RNasin (Promega) and ligated to a pre-  
1096 adenylated adaptor (/5Phos/TGGAATTCTCGGGTGCCAAGG/3ddC/) (IDT) using T4  
1097 RNA ligase (NEB) at 22°C for 2.5h, followed by precipitation. Reverse transcription was  
1098 completed using AMV-RT (Promega) and the reverse transcription primer  
1099 (/5Phos/GATCGTCGGACTGTAGAACTCTGAACCTGTCGGTGGTCGCCGTATCATT/iS  
1100 p18/CACTCA/iSp18/GCCTTGGCACCCGAGAATTCCA) (IDT) using the following  
1101 conditions. RNA and RT primer were denatured and annealed in reverse transcription  
1102 buffer (50 mM Tris-Cl pH 8.6, 60mM NaCl, 10mM DTT). After annealing, the reverse  
1103 transcription reaction was split in equal halves for the restrictive and permissive  
1104 conditions. The restrictive reaction received a final concentration of 2.5mM dNTPs, 6mM  
1105 MgCl<sub>2</sub> and 7.1% DMSO, whereas the permissive reaction received a final concentration  
1106 of 4mM dNTPs, 20mM MgCl<sub>2</sub> and 7.1% DMSO. Reactions were carried out at 42°C for

1107 1h, prior to degradation of RNA with the addition of NaOH at 85°C. Truncated cDNAs  
1108 were size-selected and purified on an 8% urea-TBE PAGE gel, followed by elution from  
1109 gel slices in DNA elution buffer (300mM NaCl, 10mM Tris-HCl, pH 8.0) overnight at room  
1110 temperature. cDNAs were circularized with circLigase (Epicentre) and amplified by PCR  
1111 (Phusion; NEB) with the forward primer (AATGATAC GGCGACCACCGA) and a  
1112 barcoded reverse primer (CAAGCAGAAGAC  
1113 GGCATACGAGATXXXXXXGTGACTGGAGTTCCTTGGCACCCGAGAATT CCA) (IDT).  
1114 PCR products were gel-purified, precipitated and sequenced on an Illumina HiSeq 2000.  
1115

### 1116 **Ribo-seq**

1117 Ribosome footprint profiling was performed essentially as described in Thompson et al.  
1118 (2016), with the following minor modifications. Yeast cells were grown to an  $A_{600nm} \approx 1.0$   
1119 or  $A_{600nm} \approx 12.0$ , harvested by vacuum filtration (<http://bartellab.wi.mit.edu/protocols.html>),  
1120 lysed using a Cryomill and cycloheximide was added to the lysis buffer (0.1 mg/mL) prior  
1121 to centrifugation. rRNA was subtracted from mRNA libraries as described (Brar et al.,  
1122 2012).

1123

### 1124 **QUANTIFICATION AND STATISTICAL ANALYSES**

1125

1126 Most statistical tests were carried out in R, except for the codon enrichment analysis,  
1127 where the tests were carried out using the scipy package in python. Plots were  
1128 generated using matplotlib in python, or the ggplot2 package from the tidyverse in R.

1129

### 1130 **eCLIP-seq data analysis**

1131 Our analysis pipeline is based on the one described by the Yeo lab (Van Nostrand et al,  
1132 2016). For full code, see <GitHub repo>. Reads were first demultiplexed by removing the

1133 first 10-nt of the forward read and adding them to the sequence name for later use;  
1134 these 10-nt correspond to the random barcode added as part of the 5' linker. The  
1135 adapter sequence was trimmed from raw reads using cutadapt (version 1.7.1), requiring  
1136 a minimum trimmed read length of 18-nt. Reads were mapped using STAR (version  
1137 2.5.1b) to a repeat-masked yeast genome. This genome was generated by masking  
1138 repetitive regions and non-coding RNA loci (particularly tRNA genes and rRNA repeats)  
1139 that had at least one identical sequence elsewhere in the genome. To ensure unique  
1140 copies of these genes, we included a pseudo-chromosome that concatenated single  
1141 copies of the masked non-coding RNA genes. We used the 10-nt barcodes to collapse  
1142 PCR duplicates, merging any reads that mapped to the same position and shared the  
1143 same barcode. Peaks were then called using the CLIPper algorithm. The pulldown and  
1144 size-matched input libraries were processed separately in this way, and finally peaks  
1145 from pulldown libraries were normalized to peaks in the input library using a  
1146 normalization pipeline (Van Nostrand et al 2016).

1147

#### 1148 **RNA-seq data analysis**

1149 RNA-seq data was analyzed with in-house Bash and Python scripts. For a given MeTH-  
1150 Seq experiment, we used the reads from the permissive library to quantify gene  
1151 expression. Reads were trimmed using cutadapt, requiring at least 5 nucleotides of  
1152 overlap between the read and the adapter, and requiring trimmed reads to be at least  
1153 18-nt long. Trimmed reads were mapped to yeast mature mRNA sequences (obtained  
1154 from SGD) and quantified using kallisto (version 0.43.1) , using options --single -l 40 -s  
1155 7. Differential expression was calculated using DESeq2 (version 1.14.1).

1156

#### 1157 **Identification of Nm sites**

1158 Sites of 2'-O-methylation were identified as previously described for pseudouridine  
1159 (Stanley et al., 2016) with modifications. MeTH-seq signal was calculated as follows. For  
1160 each position  $i$  in a 51 nt window centered at a given genomic position, the fraction of  
1161 reads in the window whose 5' ends map to  $i$  was calculated. MeTH-seq signal is the  
1162 difference in fractional reads between the restrictive and permissive libraries, multiplied  
1163 by the window size. For an identified Nm, the reported MeTH-seq signal corresponds to  
1164 the RT stop position 1 nt 3' of the site. All genomic positions with coverage of  $\geq 0.25$   
1165 reads per nt in the above described window within annotated features (downloaded from  
1166 SGD on 9/2/2011) were considered, including 5' and 3'UTRs identified in (Pelechano et  
1167 al., 2014). For Nm calling we required a reproducible peak height  $\geq 2.0$  with  
1168 reproducibility in at least 13 of 16 log phase libraries and at least 16 of 20 high density  
1169 libraries. A window size of 51 nt was examined in all libraries and only windows that  
1170 surpassed the read cutoff of 0.25 reads per nt were considered.

1171

### 1172 **Methyltransferase assignment**

1173 MeTH-seq peak heights were compared between methyltransferase deletion strains and  
1174 all libraries from a given growth condition from cells wild type for a given  
1175 methyltransferase. An Nm site was called genetically dependent on a specific Trm  
1176 enzyme if the peak heights in both *trm* $\Delta$  replicates were 1.5 standard deviations below  
1177 the mean across all libraries. This threshold was set based on the observed reductions  
1178 in peak heights at positive control tRNA<sup>Ser</sup> Um44 sites in *trm44* $\Delta$  libraries. Spb1 target  
1179 sites were called at a more stringent threshold requiring peak heights at least 2.0  
1180 standard deviations below the mean in both Spb1-depleted libraries and coverage of  $\geq$   
1181 0.25 reads per nt in the 51nt window surrounding the Nm site in both Spb1-depleted  
1182 replicates.

1183

## 1184 **MeTH-seq signal plots and ROC curves**

1185 MeTH-seq signal plots show the average of the MeTH-seq signal over the 51 nt window  
1186 (described above) for all Nm included in the analysis. To generate receiver operating  
1187 characteristic (ROC) curves for a given permissive/restrictive library pair, MeTH-seq  
1188 signal was calculated for each position within the rRNA. A range of 5000 equally spaced  
1189 cutoff scores were chosen spanning the range of observed MeTH-seq signal values. At  
1190 each cutoff score, the true positive and false positive rates were calculated, and plotted.

1191

## 1192 **SnoRNA target analysis**

1193 In this analysis, we did not attempt to predict potential target sites across the  
1194 transcriptome; instead, we aimed to identify which of the putative sites Nm sites were  
1195 consistent with modification by snoRNAs. To do this, we generated a fasta file of the 30-  
1196 nt sequences surrounding each site, which we then used to generate a BLAST  
1197 database. We identified short complementary regions between the snoRNAs and the  
1198 target sequences by running a BLAST search, using all yeast C/D box snoRNAs as  
1199 queries and the options `-task blastn-short -strand minus`. We filtered the list of hits based on  
1200 the mechanism of C/D box targeting: we required that the alignment include the putative  
1201 Nm position, and that this position were 5 or 6 nt downstream of the position opposite a  
1202 D-box.

1203

## 1204 **Codon enrichment analysis**

1205 We calculate background frequencies for each codon in each of the N wild-type libraries  
1206 used for peak calling at OD1. To calculate the frequency of a codon  $i$  in a given library,  
1207 we weigh the expression (RPKM) of each gene by the number of times it contains codon  
1208  $i$ , then sum across these and normalize by the total.

$$1209 \quad \text{codon.expression}_i = \sum_j \text{expression}_j \times \text{count}_{i,j}$$

1210 
$$\text{codon.frequency}_i = \text{codon.expression}_i / \sum_j \text{codon.expression}_j$$

1211

1212

1213 We compare the frequency of each codon among Spb1 target sites to its background  
1214 distribution using the SciPy implementation of the Student's T test.

1215 We calculate the reported fold-change as the ratio of the codon frequency in Spb1 sites  
1216 and the average frequency in the background distribution.

1217

### 1218 **Motif detection**

1219 MEME (version 4.12.0) was used to find enriched motifs among Spb1-dependent mRNA  
1220 sites. Detection was carried out on the 50-nt sequences surrounding each of the Spb1-  
1221 dependent sites, calculating motif enrichment relative to a 2-order background model  
1222 that summarized trinucleotide frequencies in the set of target sequences. The motif  
1223 search required that any identified motifs be at least 3-nt and at most 15-nt long. The  
1224 background model was generated using the fasta-get-markov script that is included with  
1225 the MEME package, using the following options: -m 2 -rna -norc.

1226

### 1227 **Pairing probability distribution**

1228 Pairing probabilities of 20-nt regions surrounding Spb1-dependent 2'OMe sites were  
1229 compared to a background set consisting of randomly selected sites from genes that  
1230 contained at least one Spb1-dependent site. For each sequence, RNAfold (ViennaRNA  
1231 package version 2.3.3) was used to obtain a pairing probability matrix. We then summed  
1232 across the columns of the matrix to calculate the probability that each position is  
1233 involved in base-pairing. To obtain a background distribution of average pairing  
1234 probabilities, the following was done for each of 100 iterations: randomly chose 391 sites



1235 from the background sets (such that each background set is as large as the target set),  
1236 then folded and obtained pairing probabilities as described above, and finally calculated  
1237 average pairing probability per position in this set and stored the result.

1238

### 1239 **Structure context of Spb1 targets**

1240 For each 20-nt sequence surrounding either a target site or a background site, we used  
1241 RNAsubopt (ViennaRNA package version 2.3.3) to obtain an ensemble of 100  
1242 suboptimal structures. These structures were labeled as follows: S for base-paired  
1243 positions, B for unpaired positions within stems, L for positions in the loop of a hairpin  
1244 loop, and F for unpaired positions at the ends of the sequence. For each position in the  
1245 sequence, we calculated the frequency with which it assumes an S, F, L or B and used  
1246 these as approximations of the probability that the position assumes each of these  
1247 conformations.

1248

### 1249 **GO Analyses**

1250 We used the statistical overrepresentation test in PANTHER (v13.0) to identify GO terms  
1251 enriched in Spb1 target genes. As a background list of genes, we used all genes  
1252 containing at least one site that met the MeTH-Seq read coverage threshold, regardless  
1253 of peak height.

1254

### 1255 **DATA AND SOFTWARE AVAILABILITY**

1256 eCLIP-Seq and MeTH-Seq data may be downloaded from the Gene Expression  
1257 Omnibus database, under accession numbers GSE109927. Analysis pipelines are  
1258 available in <GitHub repository>.

1259

1260 **FIGURE LEGENDS**

1261 Figure 1

1262 tRNA 2'-O-methyltransferases Associate with mRNAs In Vivo

1263 (A) Schematic of eCLIP procedure on an HPM-tagged methyltransferase (MTase)

1264 (B) Overlap between Trm44 non-coding RNA eCLIP targets and methylation substrates.

1265 The fraction of the library mapped to each feature is shown for two eCLIP replicates and

1266 SMI control. Genes are ordered by their abundance in SMI. tRNA<sup>Ser</sup> that are known to be

1267 modified by Trm44 are highlighted in blue. tRNA<sup>xxx</sup> (\*) is a computationally predicted

1268 tRNA<sup>Ser</sup> of unknown modification status (Lowe and Eddy, 1997).

1269 (C) Distribution of significantly enriched eCLIP peaks for Trm44. Top:  $\geq 4$ -fold versus

1270 SMI. Bottom:  $p \leq 0.001$  and  $\geq 4$ -fold-enriched versus SMI. Numbers for the bottom pie

1271 chart indicated in parentheses.

1272 (D-G) Examples of mRNA eCLIP peaks for Trm44 (D), Trm3 (E), Trm7 (F), and Trm13

1273 (G).

1274 (H) Number of significant eCLIP peaks in tRNA, mRNA, rRNA, and snoRNA for Trm3, 7,

1275 13 and 44;  $p \leq 0.001$  and  $\geq 4$ -fold enriched versus SMI.

1276 (I) Venn diagram illustrates lack of overlap between mRNAs CLIPed to different Trm

1277 proteins.

1278

1279 Figure 2

1280 Illumina Sequencing-Based Detection of 2'-O-Methyl Ribose with Single-Nucleotide

1281 Resolution

1282

1283 (A) Schematic of MeTH-seq procedure. nt, nucleotides.

1284 (B) MeTH-seq reads mapping to a 235 nt region of RDN25-1 (chrXII: 452,800-453,035)

1285 containing 8 known Nm sites (black bars). Peaks of Nm-dependent reads are indicated

1286 with dashed red lines.

1287 (C) Meta plot of MeTH-seq signal for 55 known Nm sites in rRNA.

1288 (D) Receiver operating characteristic curve of MeTH-seq signal for all known Nm in

1289 rRNA.

1290

1291 Figure 3

1292 2'-O-Methylation of mRNAs

1293

1294 (A) Distribution of reproducible MeTH-seq peaks between RNA types in exponentially

1295 growing yeast. Shown are sites with a peak height  $\geq 2.0$  in at least 13 out of 16

1296 independent experiments.

1297 (B) Example MeTH-seq peaks in mRNA. Top: genome browser views of reads from

1298 restrictive (rest) and permissive (perm) RT conditions. Bottom: MeTH-seq signal plots.

1299 (C) Overlap between MeTH-seq peaks identified in exponential (OD1) and post-diauxic  
1300 (OD12) growth. OD12 sites had peak heights  $\geq 2.0$  in at least 16 out of 20 independent  
1301 experiments.

1302 (D) MeTH-seq signal plots of TRM-dependent Nm sites.

1303 (E) Summary of Nm sites identified by MeTH-seq as TRM-dependent.

1304

1305 Figure 4

1306 mRNA Methylation by Spb1 Is Widespread

1307

1308 (A) Predicted base pairing between C/D snoRNAs and Nm sites in mRNAs is  
1309 comparable to canonical snoRNA target sites in rRNA.

1310 (B) MeTH-seq reads at putative snoRNA-dependent Nm sites.

1311 (C) Depletion of Spb1 by promoter shutoff. Top: The essential *SPB1* gene was placed  
1312 under control of a repressible GAL1 promoter (GALpSPB1) and grown in glucose to  
1313 inhibit Spb1 expression. Bottom: Tagged Spb1 protein was barely detectable by Western  
1314 blot after 2 hours. Asc1 loading control was detected as described (Coyle et al., 2009).

1315 (D) MeTH-seq signal plots of *SPB1*-dependent Nm sites.

1316 (E) Distribution of *SPB1*-dependent Nm sites between RNA types.

1317 (F) Distribution of *SPB1*-dependent Nm sites between nucleotides.

1318 (G) Methyltransferase dependence of Nm sites in mRNA.

1319

1320 Figure 5

1321 Features of mRNA Target Sites of Spb1

1322

1323 (A) *SPB1*-dependent Nm sites are enriched in CDS ( $***p < 8.1e-9$ ) and depleted from 3'  
1324 UTRs ( $*p < 1.4e-6$ ). Bonferroni corrected  $p$ -values from Fisher's exact test.

1325 (B) Distribution of *SPB1*-dependent Nm sites with respect to transcription start sites,  
1326 translation start and stop sites. Numbers indicate distance in nucleotides from landmark.

1327 (C-D) Amino acid and codon frequencies among *SPB1*-dependent Nm sites compared  
1328 to the background of all codons with adequate read coverage for MeTH-seq analysis  
1329 (STAR Methods). (C) Amino acids A, I, L, M and V are significantly overrepresented. (D)  
1330 Codon table colors reflect the fold increase or decrease in Nm site frequency compared  
1331 to background. Codons that did not contain any identified sites are indicated in grey.  $* p$   
1332  $< 0.01$ ,  $*** p < 0.0001$ , Student's T test.

1333 (E) Bias in codon positions methylated by Spb1 (**Chi Square  $p < 2.2e-16$** ).

1334 (F) Web logo of top motif enriched in Spb1 target sites. E value =  $1.7e-40$  (STAR  
1335 Methods).

1336 (G) Structural context of Spb1 sites. Each panel plots the probability that a position in  
1337 Spb1 targets (orange) or the background set (grey) assumes a loop, a stem, or an

1338 otherwise unpaired position. Top and bottom edges of the ribbons indicate 75<sup>th</sup> and 25<sup>th</sup>  
1339 percentiles respectively. *p*-values for each position (KS-test) are indicated in the  
1340 structure diagrams below—left: loops, right: stems.

1341

1342 Figure 6

1343 Spb1 Methylates and Maintains Normal Levels of mRNAs Necessary for Ribosome  
1344 Biogenesis

1345

1346 (A) Log<sub>10</sub> *p*-values for GO term enrichments among Spb1 target genes. Displayed  
1347 categories were enriched ≥4-fold compared to the background of all genes with  
1348 adequate read coverage for MeTH-seq analysis in Spb1-depleted cells. GO enrichment  
1349 *p*-values were obtained using PANTHER v13.0.

1350 (B) Volcano plot of RNA-seq data shows reduced levels of Spb1 target mRNAs in Spb1-  
1351 depleted cells.

1352 (C) mRNAs with multiple *SPB1*-dependent Nm sites show greater reductions in Spb1-  
1353 depleted cells. KS test \* *p*<0.0166, \*\*\* *p*<2.2e-16.

1354 (D) Spb1 target mRNAs encoding ribosomal proteins showed the largest reductions. KS  
1355 test *p* < 4.31e-08 For RNA-seq analysis, n=2 for Spb1-depleted cells and n=6 for wild  
1356 type control cells.

1357

1358 **TABLES**

- 1359 Table S1: Yeast strains used in this study.
- 1360 Table S2: Sequencing read summary for eCLIP libraries.
- 1361 Table S3: Trm44 eCLIP clusters: positions, enrichments and  $p$ -values.
- 1362 Table S4: Pus1 eCLIP clusters: positions, enrichments and  $p$ -values.
- 1363 Table S5: Trm3 eCLIP clusters: positions, enrichments and  $p$ -values.
- 1364 Table S6: Trm7 eCLIP clusters: positions, enrichments and  $p$ -values.
- 1365 Table S7: Trm13 eCLIP clusters: positions, enrichments and  $p$ -values.
- 1366 Table S8: MeTH-seq peaks in rRNA, peak height  $\geq 4.0$ .
- 1367 Table S9: All MeTH-seq peaks  $\geq 2.0$  in log phase (OD1).
- 1368 Table S10: MeTH-seq peaks in rRNA,  $4.0 \geq$  peak height  $\geq 2.0$ .
- 1369 Table S11: All MeTH-seq peaks  $\geq 2.0$  in post-diauxic phase (OD12).
- 1370 Table S12: TRM-dependent Nm sites (OD1 and OD12).
- 1371 Table S13: Summary of predicted snoRNA-dependent Nm sites in mRNA.
- 1372 Table S14: Spb1 eCLIP clusters: positions, enrichments and  $p$ -values.
- 1373 Table S15: *SPB1*-dependent Nm sites in log phase (OD1).
- 1374 Table S16: *SPB1*-dependent Nm sites in post-diauxic phase (OD12).
- 1375 Table S17: GO term summary: Spb1 target mRNAs.

1376

## 1377 **SUPPLEMENTAL FIGURE LEGENDS**

1378

1379 Figure S1

1380 eCLIP Analysis of tRNA 2'-O-Methyltransferases, Related to Figure 1

1381

- 1382 (A) Summary of canonical non-coding RNA targets of yeast 2'-O-methyltransferases.
- 1383 (B) 32P labeled RNA immunoprecipitated with anti-Myc from cross-linked Trm44-HPM  
1384 and untagged control.
- 1385 (C) Read coverage in Pus1 and Trm44 eCLIP libraries for significantly enriched Trm44  
1386 mRNA eCLIP peaks ( $p \leq 0.001$  and  $\geq 4$ -fold enriched versus SMI).
- 1387 (D) Anti-Myc immunoprecipitates from cross-linked Trm3-HPM, Trm7-HPM, and Trm13-  
1388 HPM. Left: 32P labeled co-immunoprecipitated RNA. Right: Western blots. \* background  
1389 band.
- 1390 (E-G) Overlap between non-coding RNA eCLIP targets and canonical methylation  
1391 substrates of Trm3 (E), Trm7 (F) and Trm13 (G). The fraction of the library mapped to  
1392 each feature is shown for two eCLIP replicates and SMI control. Genes are ordered by  
1393 their abundance in SMI. tRNAs that are known to be modified are highlighted in blue.

1394

1395 Figure S2

1396 Controls for Transcriptome-wide Mapping of 2'-O-Methyl Ribose with MeTH-seq, Related  
1397 to Figure 2

1398

- 1399 (A) Left: Meta plot of MeTH-seq signal at rRNA Nm sites detected by primer extension  
1400 with limiting dNTPs (purple line) or limiting  $Mg^{2+}$  (green line). AMV was the reverse  
1401 transcriptase used. Right: Receiver operating characteristic curves for MeTH-seq signal  
1402 at all known Nm in rRNA obtained using different reaction conditions.



1403 (B) Left: Meta plot of MeTH-seq signal at rRNA Nm sites detected by primer extension  
1404 using AMV (purple line) or SSIII (green line) reverse transcriptases. In both reactions,  
1405 magnesium was limiting. Right: Receiver operating characteristic curves for MeTH-seq  
1406 signal at all known Nm in rRNA obtained using different reverse transcriptases.

1407 (C) Deletion of C/D snoRNAs eliminated MeTH-seq peaks at their corresponding rRNA  
1408 target sites.

1409 (D) Apparent Nm site misannotations identified by MeTH-seq.

1410 (E) Examples of false positive MeTH-seq peaks in rRNA.

1411 (F) Reproducibility of MeTH-seq peak heights at known Nm in rRNA.

1412 (G) Sequence bias in Nm site signal from MeTH-seq.

1413

1414 Figure S3

1415 Conditions of Regulated mRNA 2'-O-Methylation, Related to Figure 3

1416

1417 (A) Yeast growth curve. Cells were harvested for MeTH-seq analysis in mid exponential  
1418 growth (OD1) and when cultures reached OD12, after the diauxic shift and before  
1419 stationary phase.

1420 (B) Ribosome footprint profiling reveals widespread differences in gene expression  
1421 between log phase (OD1) and post-diauxic growth (OD12). Ribosome profiling results  
1422 were reproducible,  $R^2=0.9$ . Rpkm, reads per kilobase per million mapped reads.

1423 (C) RNA-seq data showing that expression levels minimally affect identification of  
1424 regulated Nm sites in mRNAs. Average log-transformed expression levels (TPM) from  
1425 two growth conditions for all mRNAs in which MeTH-seq identified Nm sites in both log  
1426 phase and post-diauxic growth (red), log phase only (blue), and post-diauxic only  
1427 (green). n=6 replicates for each condition.

1428

1429 Figure S4

1430 eCLIP Analysis of Spb1 and Effects of Spb1 Depletion on rRNA 2'-O-Methylation at  
1431 snoRNA-Dependent Sites, Related to Figure 4

1432

1433 (A) Distribution of significantly enriched eCLIP peaks for Spb1,  $p \leq 0.001$  and  $\geq 4$ -fold  
1434 enriched versus SMI.

1435 (B-D) MeTH-seq signal plots of rRNA Nm sites with reproducible slight reductions of  
1436 signal in *SPB1*-depleted cells. These sites are methylated by Nop1 guided by snR48 (B),  
1437 snR62 (C), and snR48 (D).

1438

1439 Figure S5

1440 Codon and Motif Features of mRNA Target Sites of Spb1, Related to Figure 5

1441

1442 (A) Frequency of codons among *SPB1*-dependent Nm sites compared to the  
1443 background of all codons with adequate read coverage for MeTH-seq analysis (STAR  
1444 Methods).

1445 (B-D) Ribosome footprint distributions. Ribosomal A sites aligned to Nm sites from wild  
1446 type cells (B), *dom34Δ* mutants defective in No-Go Decay (C), and His codons in cells  
1447 treated with 3-AT (D). Ribosome profiling data from (Guydosh and Green, 2014).

1448 (E) Web logos of significantly enriched motifs within a 50-nucleotide window surrounding  
1449 novel *SPB1*-dependent Nm sites. The first motif (top) was found in 71/409 mRNA sites.  
1450 The second was found exclusively in pre-tRNAs and the third was found in 15 mRNA  
1451 sites.

1452 (F) Relative distances between *SPB1*-dependent Nm sites and the center of UGNUGN  
1453 motifs (as called by MEME).

1454 (G) Average pairing probability in the 20-nt surrounding Spb1-dependent Nm sites  
1455 (orange) or a background set of sites (grey).

1456

1457 Figure S6

1458 Global Effects of Spb1 Depletion on mRNA Abundance, Related to Figure 6

1459

1460 (A) Cumulative distributions of mRNA levels. Spb1 target genes were highly expressed  
1461 compared to the background of all genes with adequate read coverage for MeTH-seq

1462 analysis in wild type controls (n=6) and showed reduced levels in Spb1-depleted cells  
1463 (n=2). TPM, transcripts per million. KS test  $p$ -values are indicated.

1464 (B) Volcano plot of RNA-seq data shows reduced levels of ribosomal protein mRNAs in  
1465 Spb1-depleted cells.

1466 (C) Levels of ribosomal protein mRNAs that are Spb1 targets were significantly reduced  
1467 compared to non-targets. KS test,  $p < 5.9e-15$ .

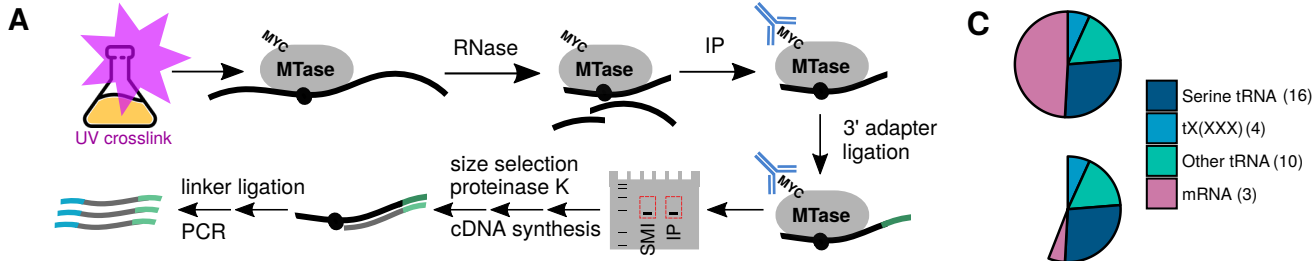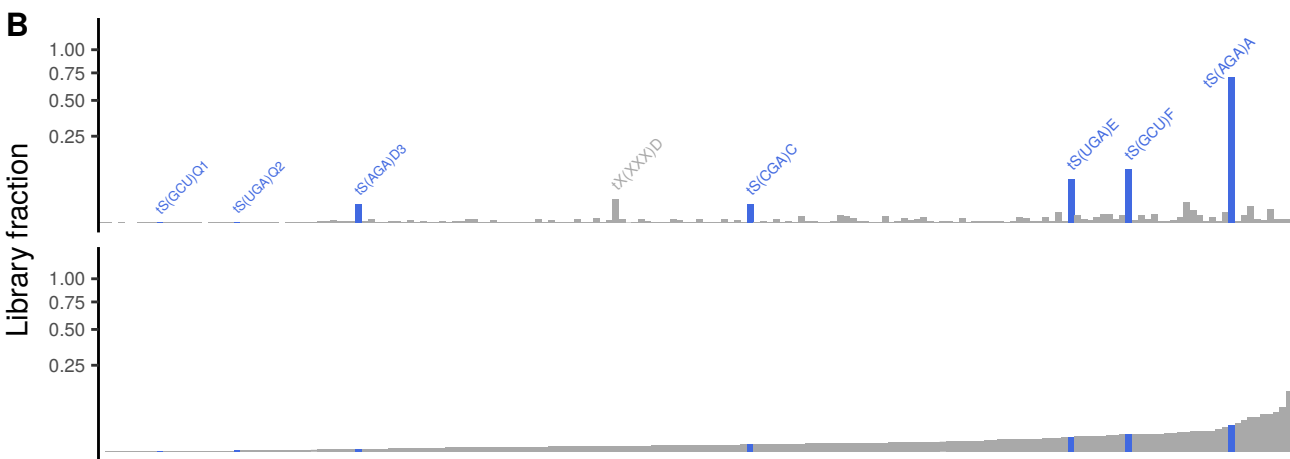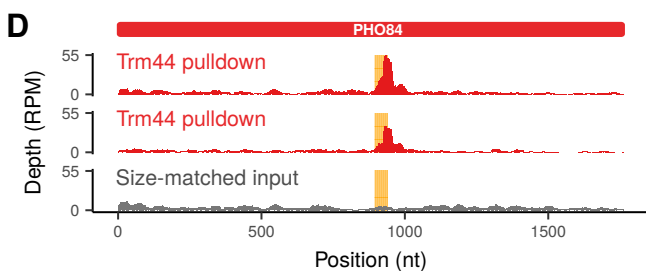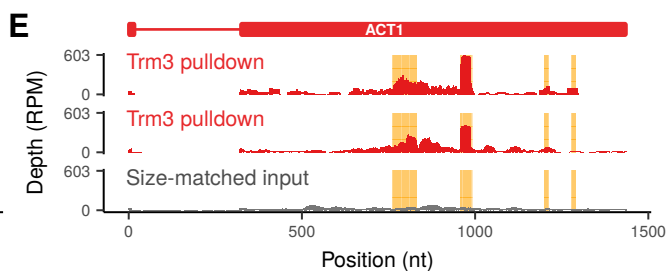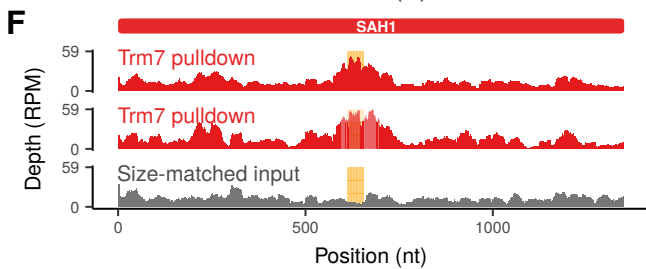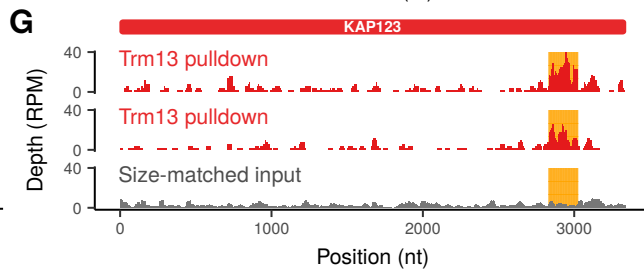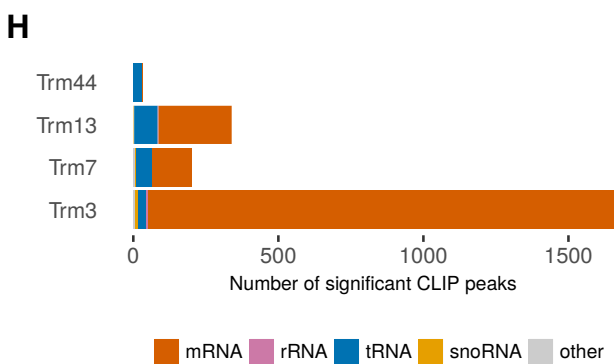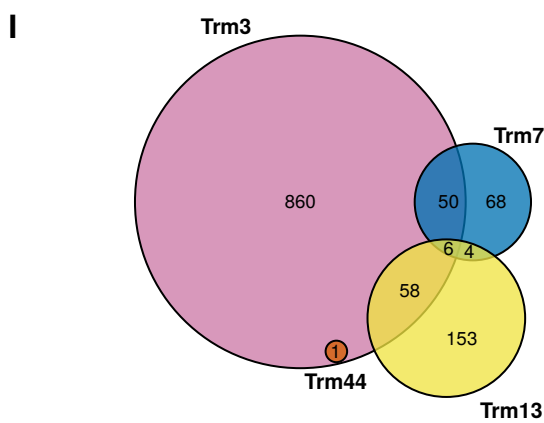

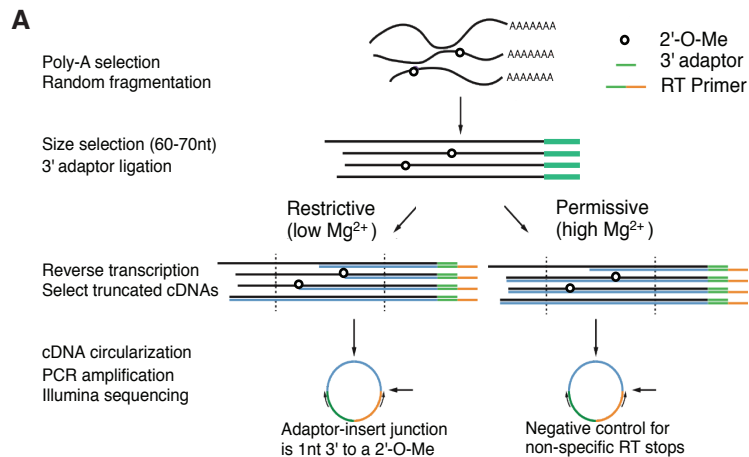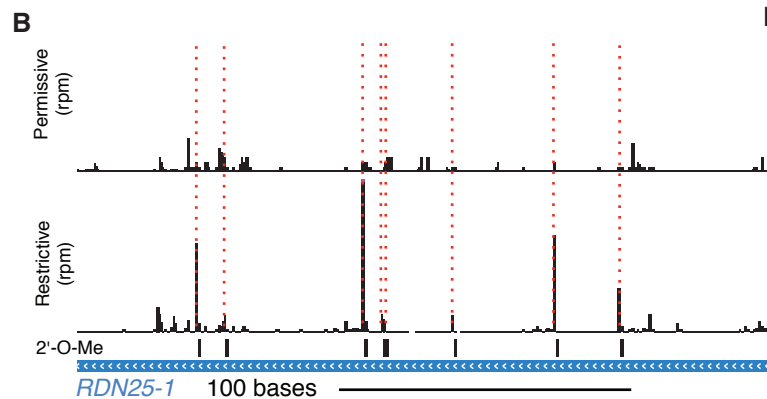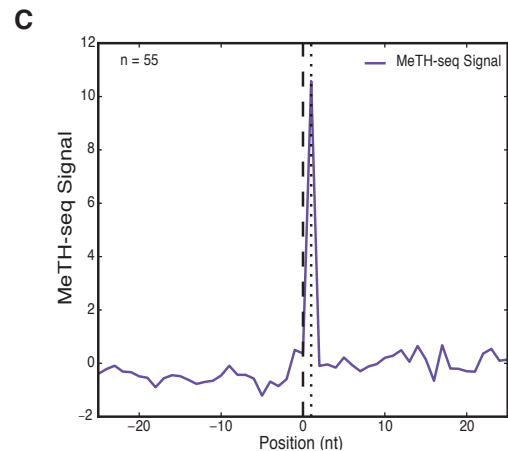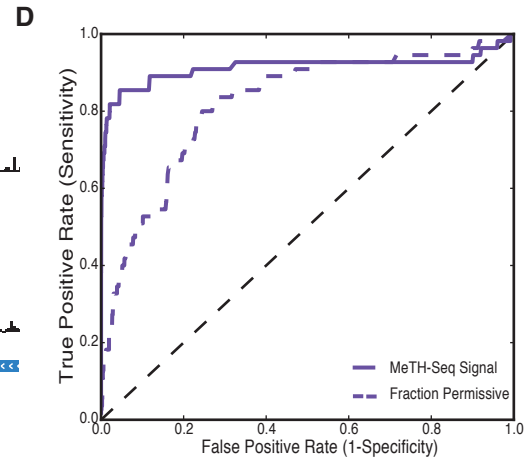

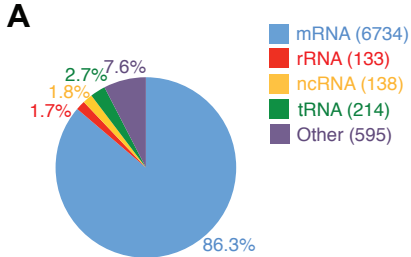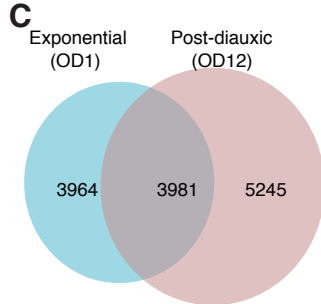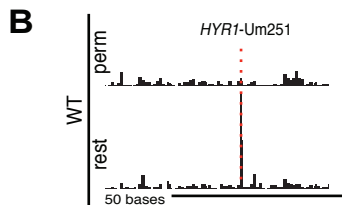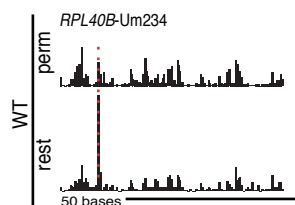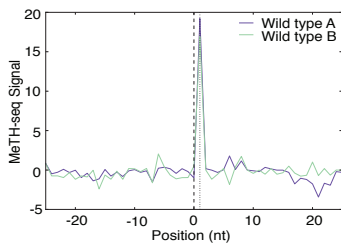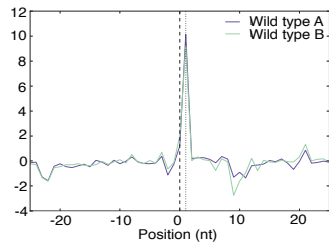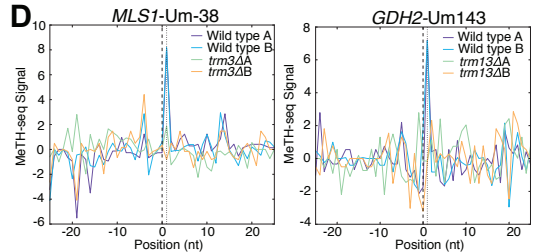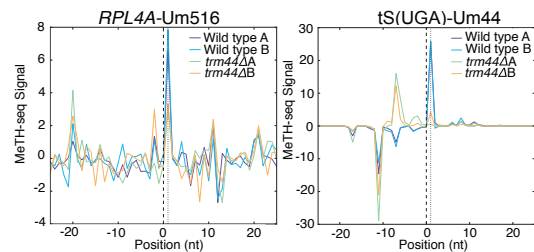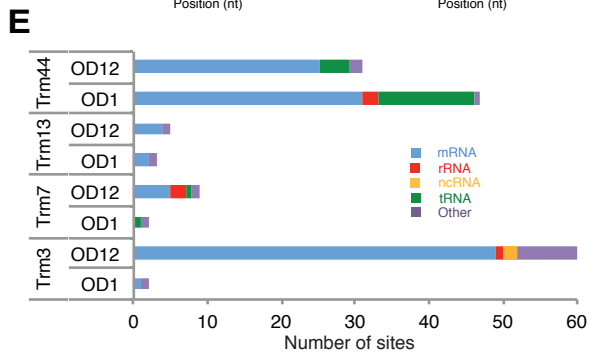

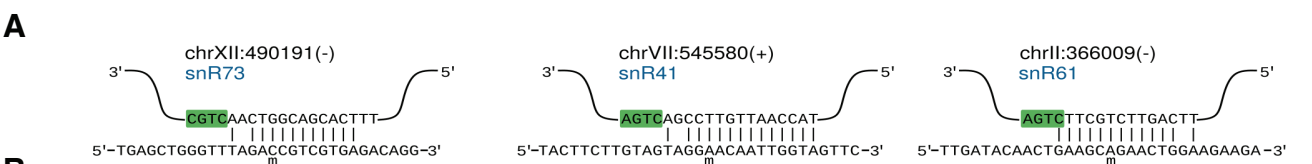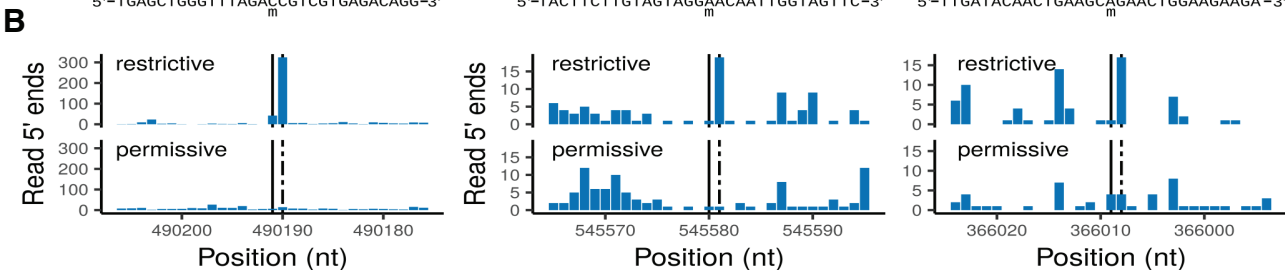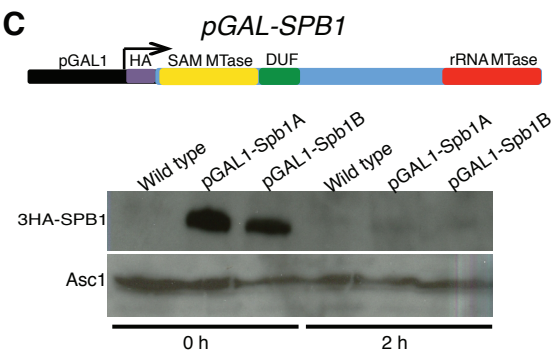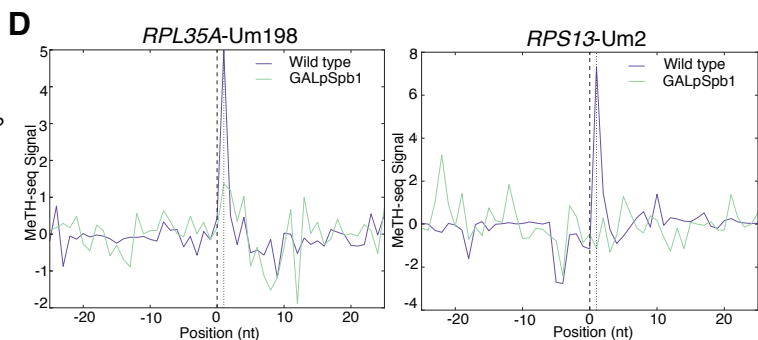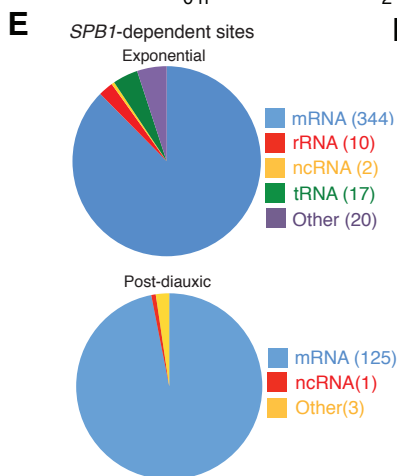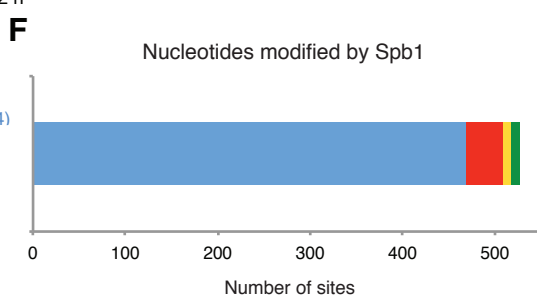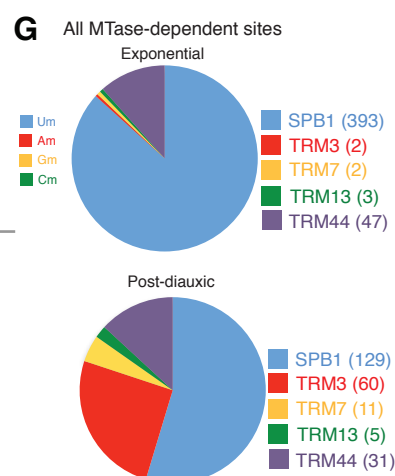



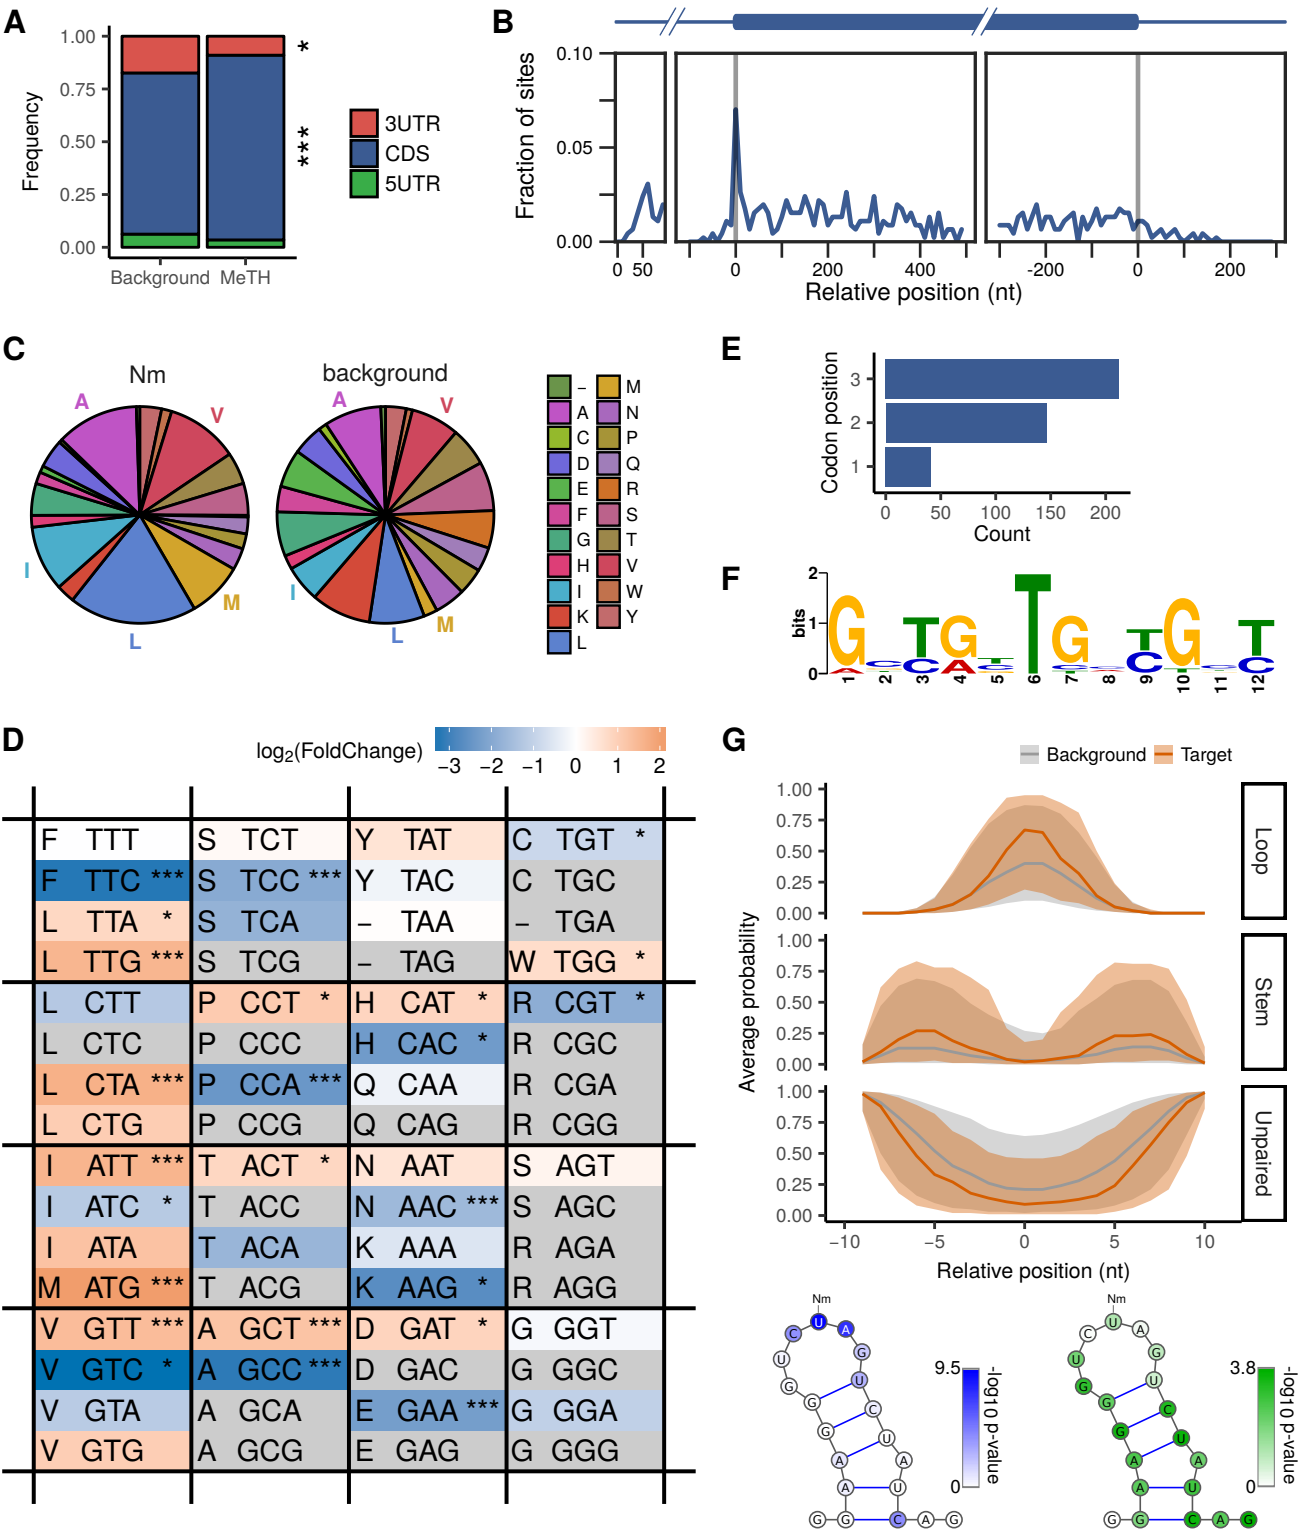

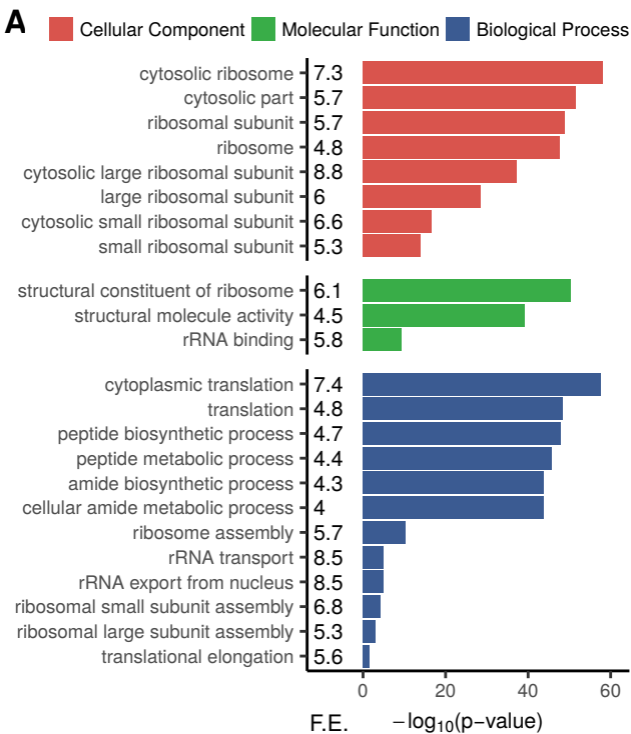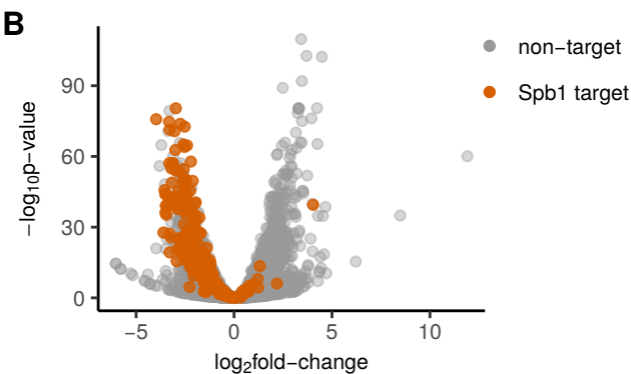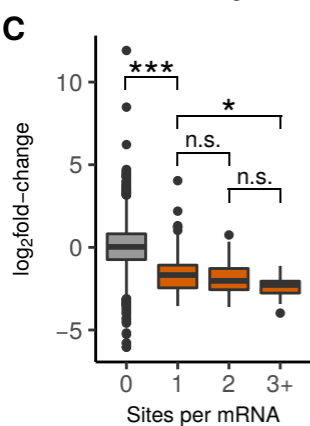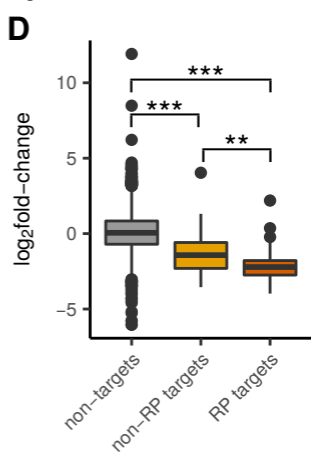

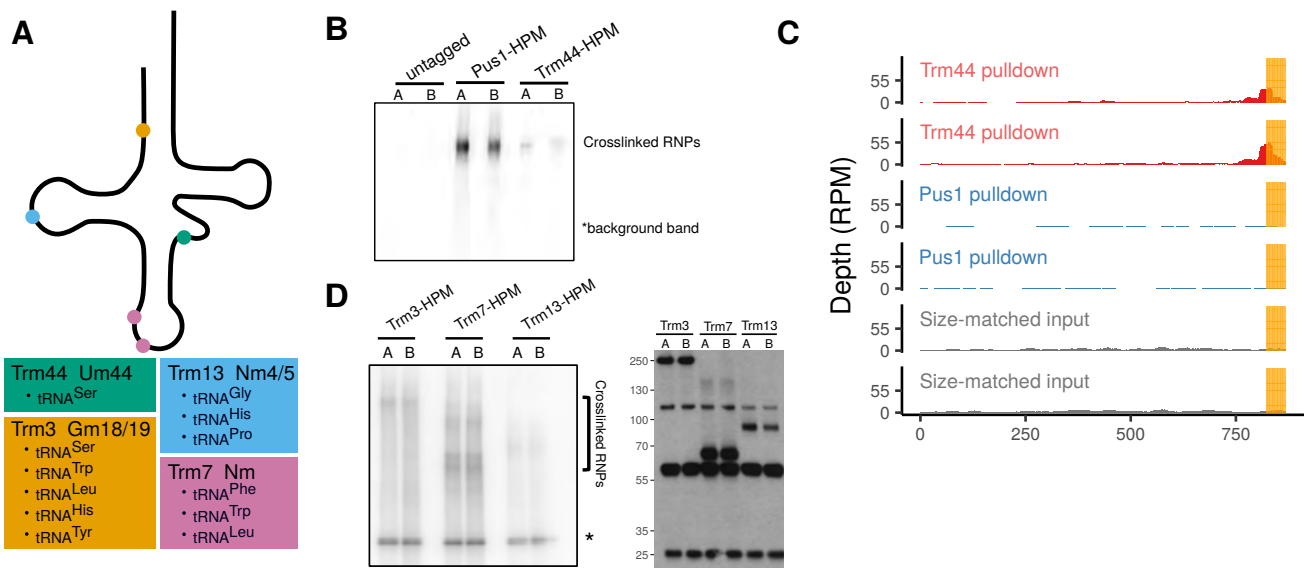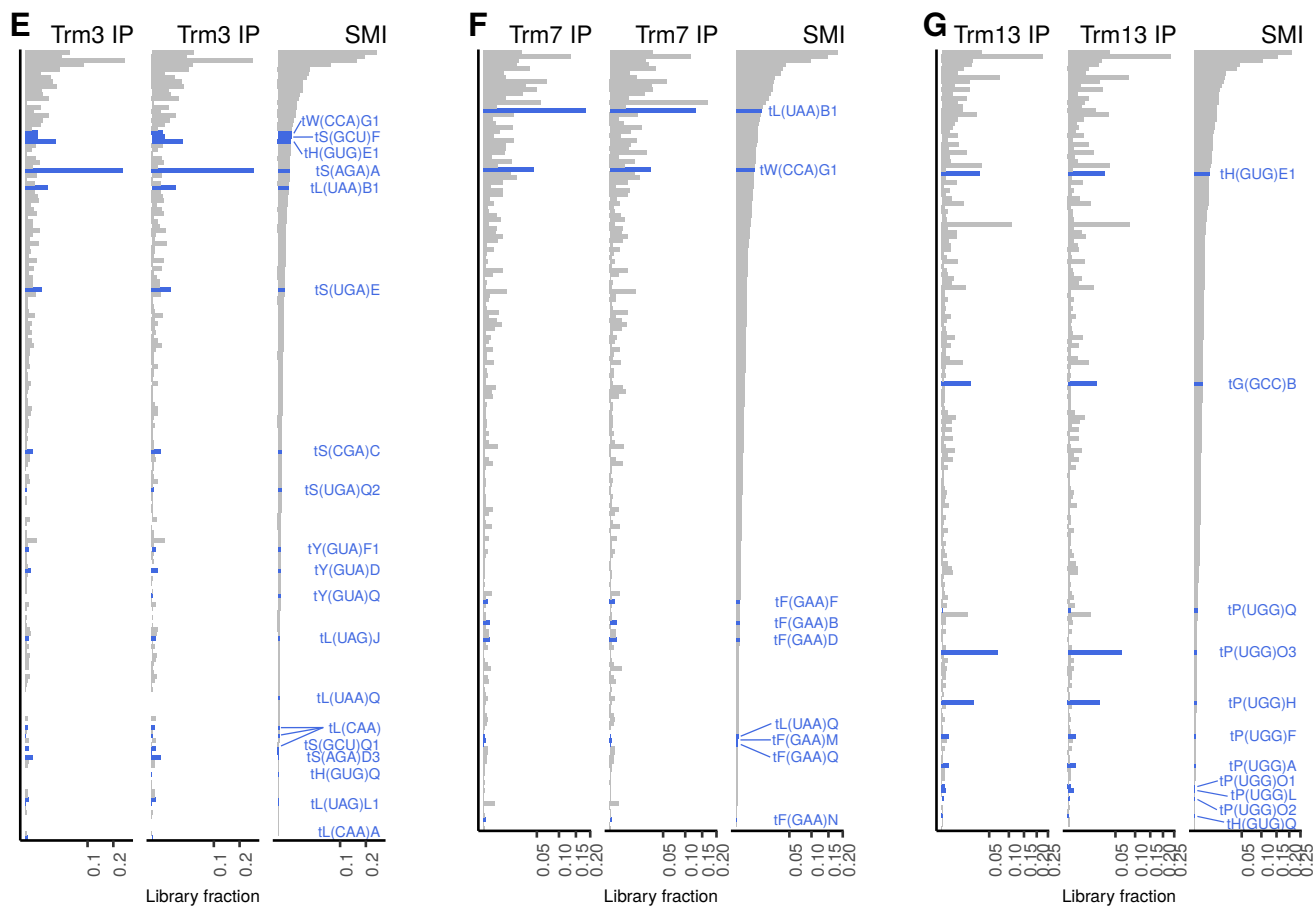

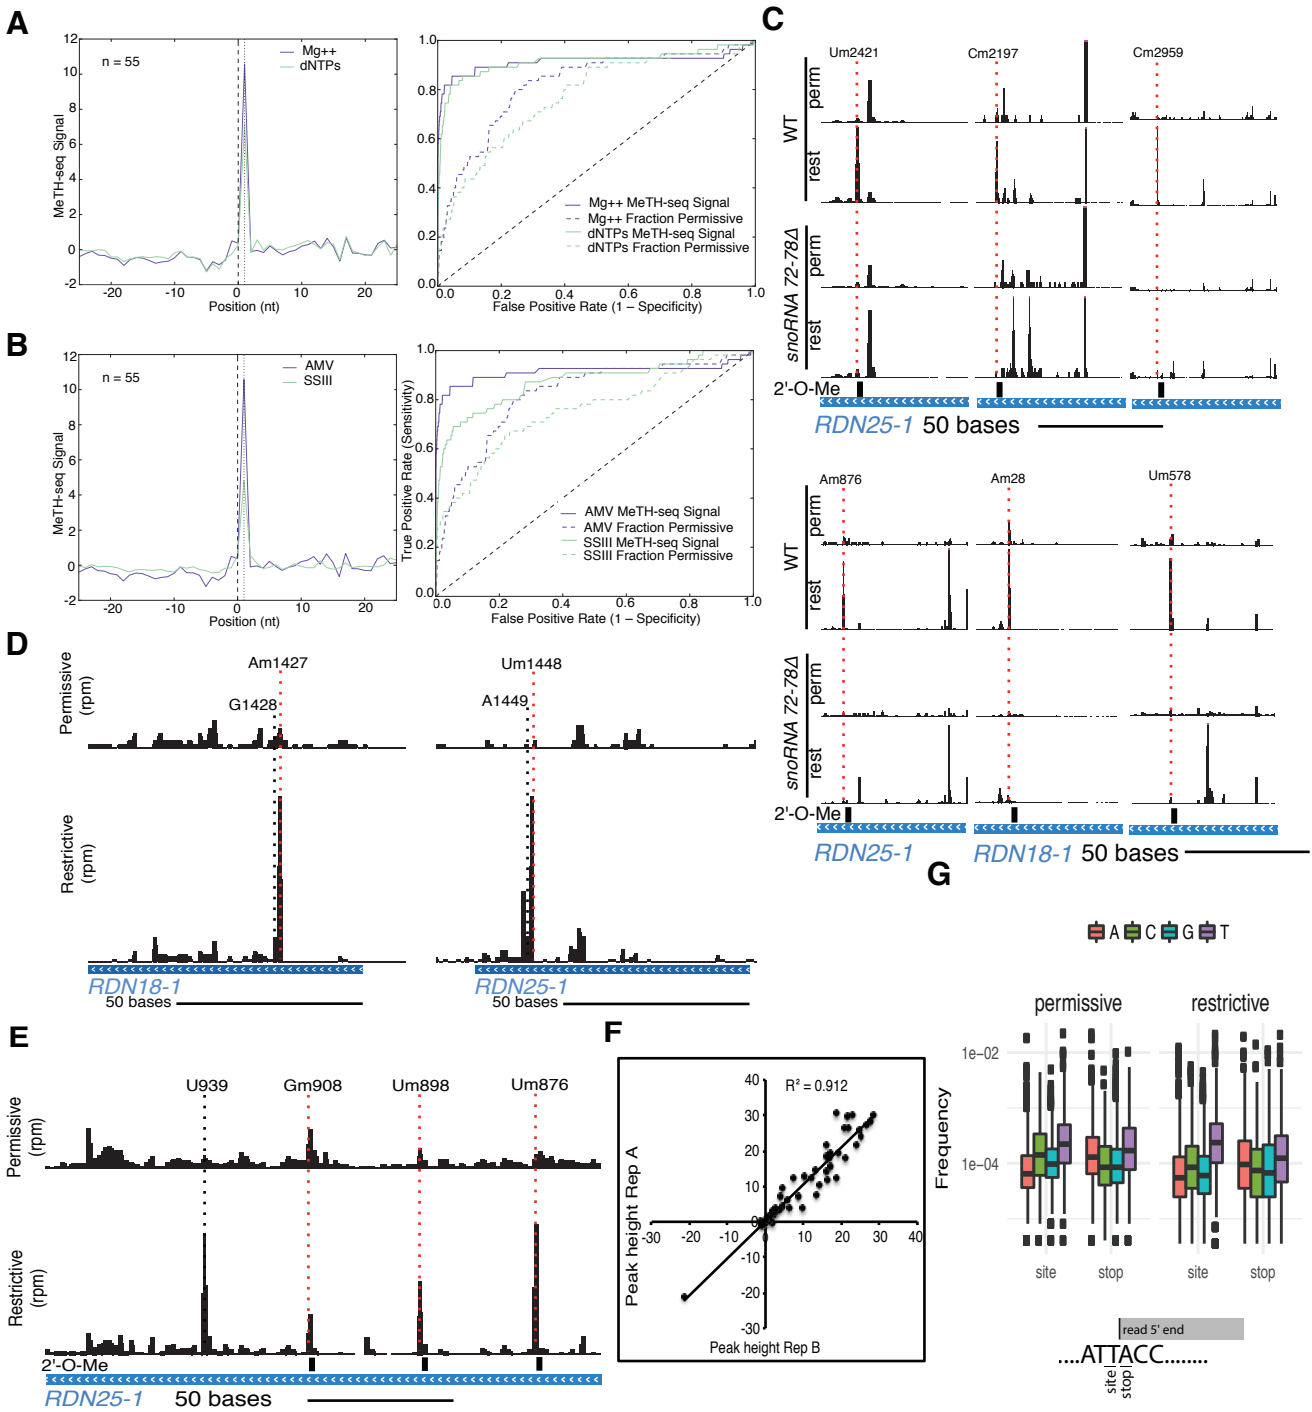

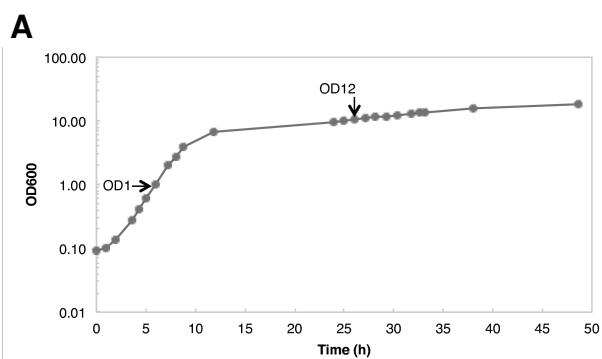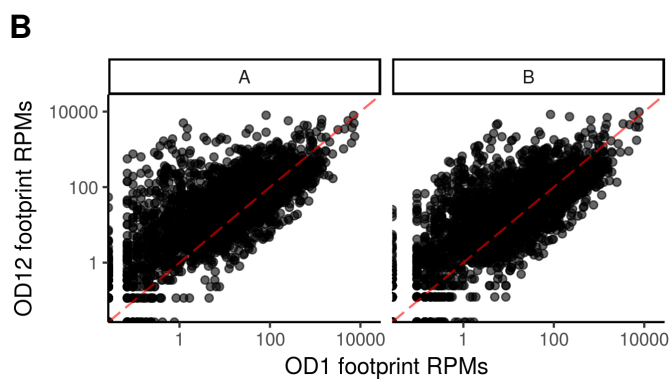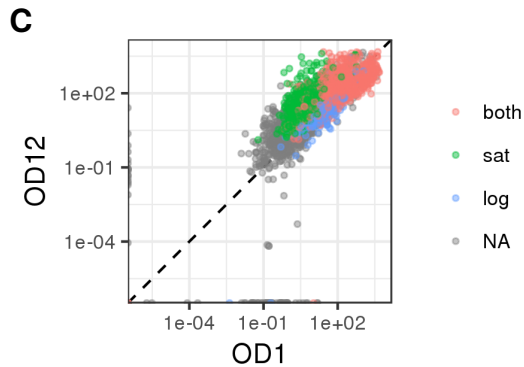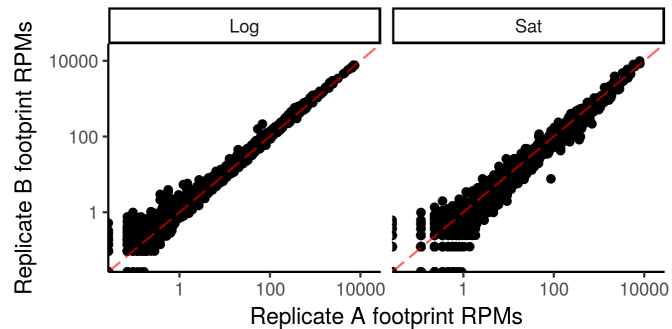

**A**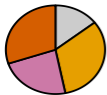

Spb1 CLIP targets

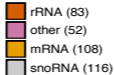**B***RDN25-Gm2793*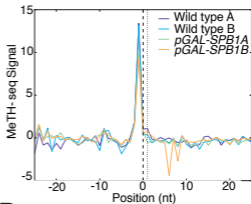**C***RDN25-Um1888*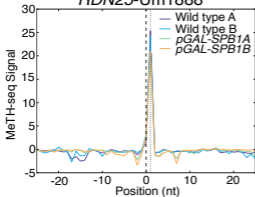**D***RDN25-Gm2791*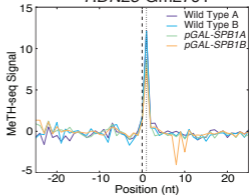

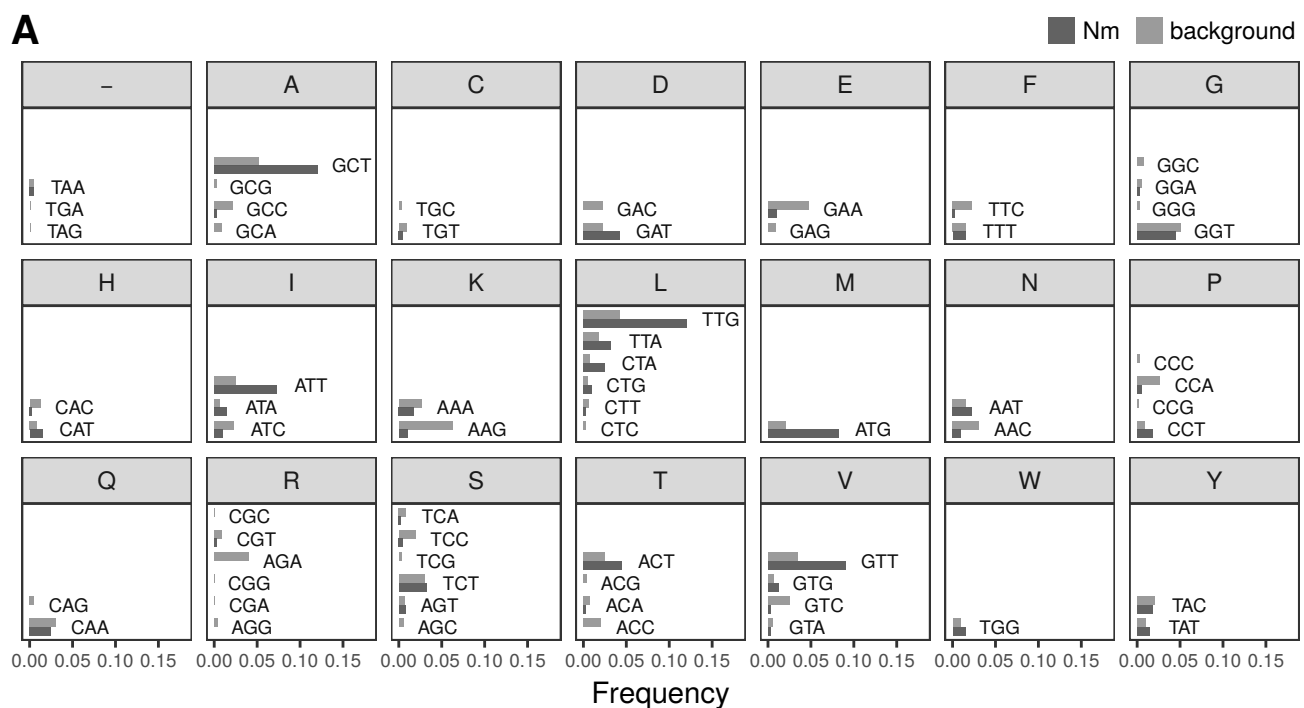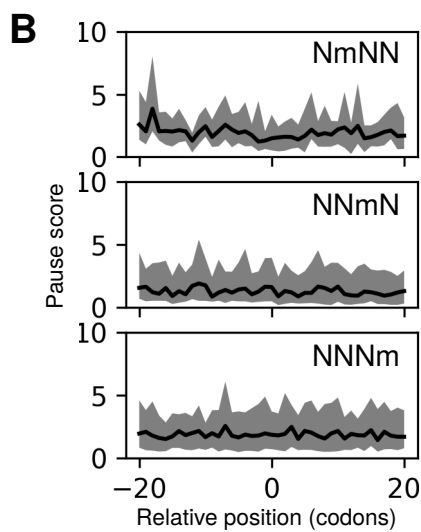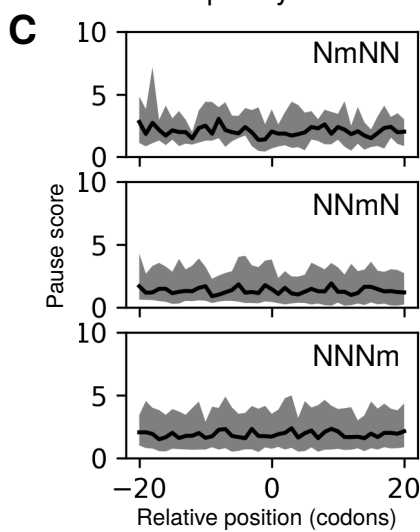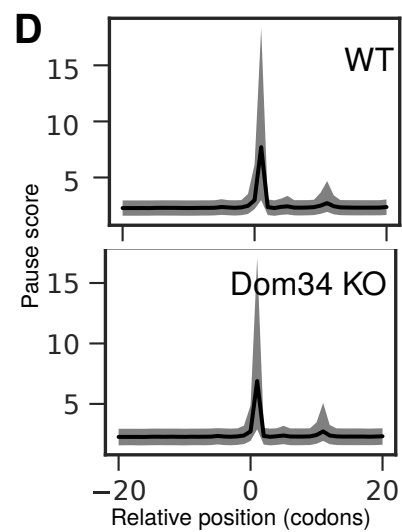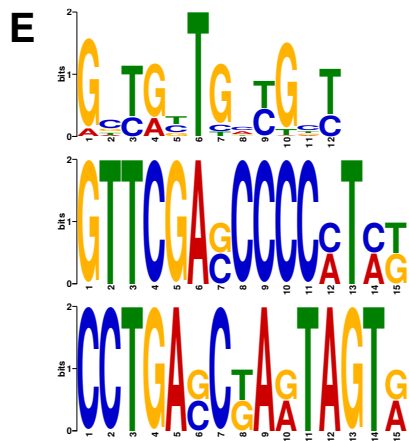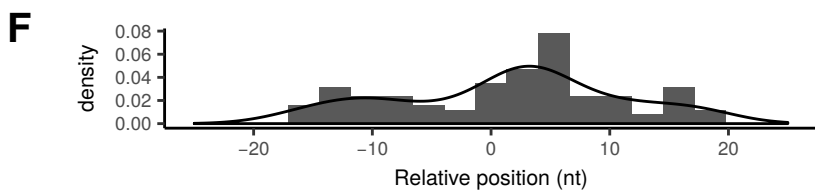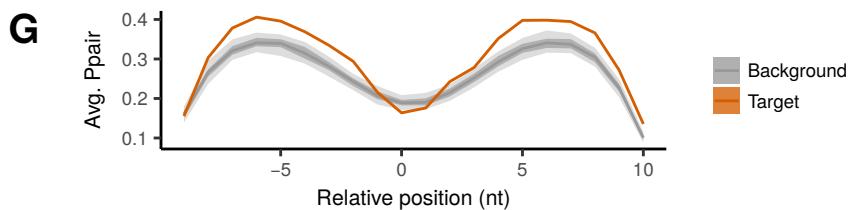

**A**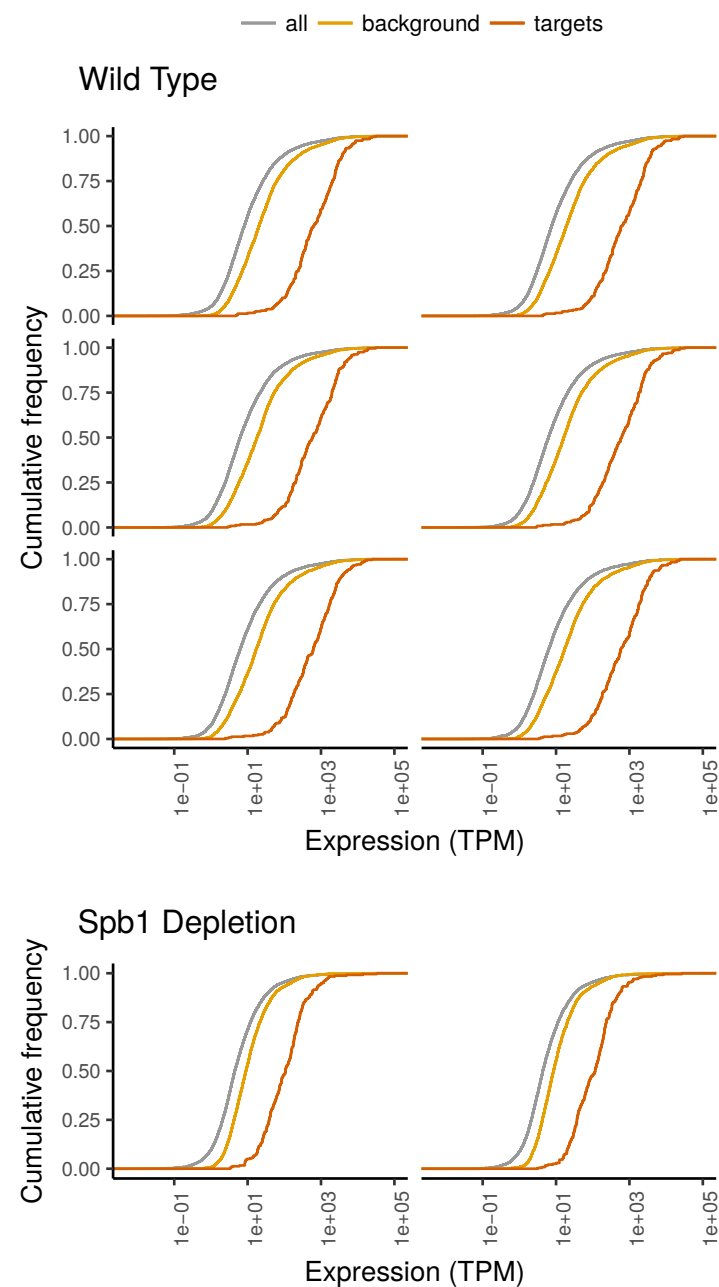**B**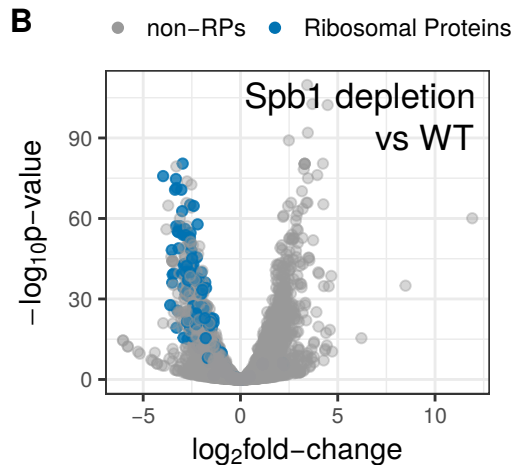**C**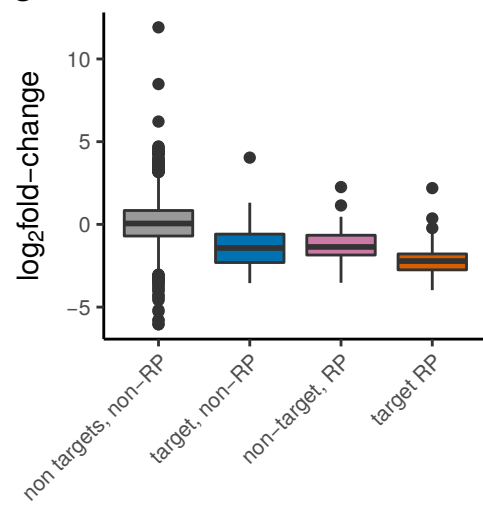**D**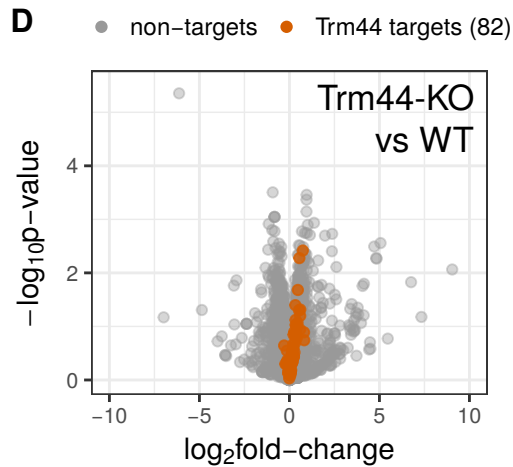

Source: https://www.biorxiv.org/content/10.1101/271916v1.full.pdf
